# Supplementary material for: Transition-metal-free direct nucleophilic substitution of carboranyllithium and 2-halopyridines
Source: Royal Society of Chemistry journal article supplement (doi:10.1039/c9ob00978g), 2019-01-01

## Supporting Information

### Transition-Metal-Free Direct Nucleophilic Substitution of Carboranyl lithium and 2-Halopyridines

Ju-You Lu, <sup>\*ab</sup> Bo Zhao, <sup>b</sup> Yongmei Du, <sup>b</sup> Jianxin Yang <sup>a</sup> and Jian Lu <sup>\*b</sup>

<sup>a</sup> Laboratory of Green Catalysis and Reaction Engineering of Haikou, Hainan Provincial Fine Chemical Engineering Research Center, School of Sciences, Hainan University, Haikou 570228, China. E-mail: [lujy@hainanu.edu.cn](mailto:lujy@hainanu.edu.cn)

<sup>b</sup> State Key Laboratory of Fluorine & Nitrogen Chemicals, Xi'an Modern Chemistry Research Institute, Xi'an, Shaanxi 710065, China. E-mail: [lujian204@263.net](mailto:lujian204@263.net).

### Table of Contents

|                               |   |
|-------------------------------|---|
| 1. General Procedures .....   | 1 |
| 2. Experimental Section ..... | 1 |
| 3. References .....           | 7 |
| 4. NMR Spectra .....          | 8 |

## 1. General Procedures

All reactions were carried out under a nitrogen atmosphere using oven dried glassware and standard Schlenk techniques. All organic solvents were freshly dried and distilled over sodium.  $^1\text{H}$  NMR spectra at 500 MHz,  $^{13}\text{C}$  NMR spectra at 125 MHz and  $^{11}\text{B}$  NMR spectra at 160 MHz were obtained on a Bruker-AV500 spectrometer.  $^1\text{H}$  NMR and  $^{13}\text{C}$  NMR were recorded using tetramethylsilane (TMS) in the solvent of  $\text{CDCl}_3$  as the internal standard ( $^1\text{H}$  NMR: TMS at 0.00 ppm,  $\text{CDCl}_3$  at 7.26 ppm.  $^{13}\text{C}$  NMR:  $\text{CDCl}_3$  at 77.0 ppm). All  $^{11}\text{B}$  NMR chemical shifts are referenced to external  $\text{BF}_3 \cdot \text{OEt}_2$  (0.00 ppm) with a negative sign indicating an upfield shift. Mass spectra were recorded on a ThermoFisher Q Exactive GC spectrometer.

## 2. Experimental Section

### 2.1 Optimization of reaction conditions

**Table S1.** Optimization of reaction conditions for nucleophilic substitution of carboranyllithium<sup>a</sup>

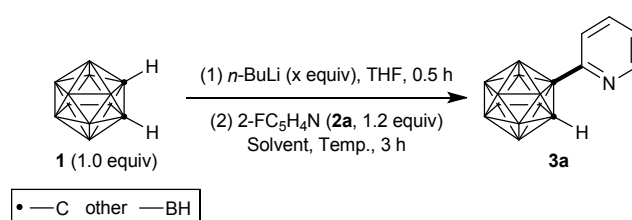

| Entry | <i>n</i> -BuLi (x equiv.) | Solvent           | Temperature (°C) | Yield (%) <sup>b</sup> |
|-------|---------------------------|-------------------|------------------|------------------------|
| 1     | 1                         | THF               | 70               | 32                     |
| 2     | 2                         | THF               | 70               | 59                     |
| 3     | 3                         | THF               | 70               | 86                     |
| 4     | 4                         | THF               | 70               | 77                     |
| 5     | 3                         | THF               | 60               | 82                     |
| 6     | 3                         | THF               | 50               | 68                     |
| 7     | 3                         | THF               | 40               | 41                     |
| 8     | 3                         | THF               | 25               | 23                     |
| 9     | 3                         | THF               | 80               | 85 <sup>c</sup>        |
| 10    | 3                         | THF               | 90               | 83 <sup>c</sup>        |
| 11    | 3                         | Et <sub>2</sub> O | 40               | 25                     |
| 12    | 3                         | 1,4-Dioxane       | 70               | 62                     |
| 13    | 3                         | DME               | 70               | 71                     |
| 14    | 3                         | DME               | 80               | 66                     |
| 15    | 3                         | DME               | 90               | 63                     |

<sup>a</sup> Reaction condition: (1) **1** (0.25 mmol), *n*-BuLi (x equiv.), THF (1 mL), 0.5 h in a Schlenk tube under nitrogen atmosphere. (2) **2a** (0.3 mmol), Solvent (1 mL), 3 h in a Schlenk tube under nitrogen atmosphere. <sup>b</sup> Isolated yield. <sup>c</sup> Using THF in a sealed tube. THF = Tetrahydrofuran, Et<sub>2</sub>O = Diethyl ether, DME = 1,2-Dimethoxyethane.

## 2.2 Study on the reactivity of electrophiles

**Table S2.** Nucleophilic substitution of carboranyl lithium<sup>a</sup>

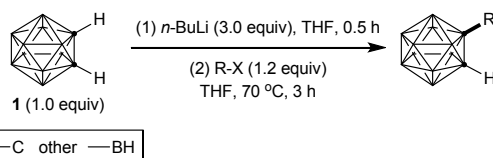

| Entry | Substrates     | Products | Yield (%) <sup>b</sup> |
|-------|----------------|----------|------------------------|
| 1     | <i>n</i> -BuCl |          | 76                     |
| 2     |                |          | 0                      |
| 3     |                |          | 0 <sup>c</sup>         |
| 4     |                |          | 0                      |
| 5     |                |          | 0                      |
| 6     |                |          | 0 <sup>d</sup>         |

<sup>a</sup> Reaction condition: (1) **1** (0.25 mmol), *n*-BuLi (3.0 equiv.), THF (1 mL), 0.5 h in a Schlenk tube under nitrogen atmosphere. (2) R-X (0.3 mmol), THF (1 mL), 3 h in a Schlenk tube under nitrogen atmosphere.

<sup>b</sup> Isolated yield. <sup>c</sup> 55 °C instead of 70 °C. <sup>d</sup> 65 °C instead of 70 °C. THF = tetrahydrofuran.

**2.3 General procedure for transition-metal-free direct nucleophilic substitution of carboranyl lithium with 2-halopyridines.** In a dry Schlenk flask, *n*-BuLi (1.6 M in *n*-hexane, 0.75 mmol, 0.47 mL) was added slowly to a THF solution (1 mL) of **1** (0.25 mmol, 36 mg) at 0 °C. The solution was kept at low temperature with stirring for 0.5 h, and allowed to reach room temperature. Subsequently, 2-halopyridines (0.3 mmol) were added under an inert nitrogen atmosphere, the mixture was heated at 70 °C under stirring in a closed flask. After the reaction was completed, a saturated solution of aqueous NH<sub>4</sub>Cl was added and the mixture was extracted three times with diethyl ether. The organic phases were collected, and solvent evaporation under reduced pressure afforded the crude product, which was then purified by column chromatography to provide the product, by using silica gel as stationary phase and *n*-hexane as eluent.

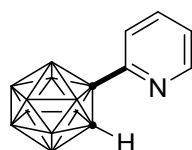

**3a:** Yield 86%. Colorless crystals, mp 110-111 °C.

<sup>1</sup>H NMR (500 MHz, CDCl<sub>3</sub>) δ 8.42 (d, *J* = 4.2 Hz, 1H), 7.71 (t, *J* = 7.8 Hz, 1H), 7.54 (d, *J* = 8.0 Hz, 1H), 7.31 (dd, *J* = 6.8, 5.0 Hz, 1H), 4.99 (s, 1H).

<sup>13</sup>C NMR (126 MHz, CDCl<sub>3</sub>) δ 151.01, 148.73, 137.34, 124.29, 121.51, 75.26, 56.84.

<sup>11</sup>B NMR (160 MHz, CDCl<sub>3</sub>) δ -3.60 (t, *J* = 141.3 Hz, 2B), -8.44 (d, *J* = 150.7 Hz, 2B), -9.67 – -14.59 (m, 6B).

<sup>11</sup>B{<sup>1</sup>H} NMR (160 MHz, CDCl<sub>3</sub>) δ -3.19 (s, 1B), -4.01 (s, 1B), -8.43 (s, 2B), -10.58 (s, 2B), -11.45 (s, 2B), -13.29 (s, 2B).

HRMS: *m/z* calcd for C<sub>7</sub>H<sub>15</sub><sup>10</sup>B<sub>2</sub><sup>11</sup>B<sub>8</sub>N [M]<sup>+</sup>: 221.2208. Found: 221.2209.

The NMR data are consistent with the reported ones.<sup>[1-4]</sup>

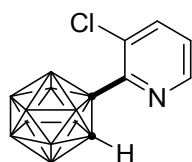

**3b:** Yield 83%. Colorless crystals, mp 145-146 °C.

<sup>1</sup>H NMR (500 MHz, CDCl<sub>3</sub>) δ 8.36 (dd, *J* = 4.5, 1.5 Hz, 1H), 7.75 (dd, *J* = 8.1, 1.5 Hz, 1H), 7.28 (dd, *J* = 8.1, 4.5 Hz, 1H), 5.47 (s, 1H).

<sup>13</sup>C NMR (126 MHz, CDCl<sub>3</sub>) δ 146.66, 145.49, 141.08, 130.54, 125.33, 74.54, 60.34.

<sup>11</sup>B NMR (160 MHz, CDCl<sub>3</sub>) δ -2.50 (t, *J* = 128.4 Hz, 2B), -6.53 – -15.85 (m, 8B).

<sup>11</sup>B{<sup>1</sup>H} NMR (160 MHz, CDCl<sub>3</sub>) δ -2.20 (s, 1B), -2.85 (s, 1B), -8.56 (s, 2B), -9.89 (s, 2B), -11.60 (s, 2B), -13.47 (s, 2B).

HRMS: *m/z* calcd for C<sub>7</sub>H<sub>14</sub><sup>10</sup>B<sub>2</sub><sup>11</sup>B<sub>8</sub>ClN [M]<sup>+</sup>: 255.1818. Found: 255.1817.

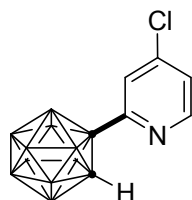

**3c:** Yield 66%. Colorless crystals, mp 94-95 °C.

$^1\text{H}$  NMR (500 MHz,  $\text{CDCl}_3$ )  $\delta$  8.31 (d,  $J = 5.3$  Hz, 1H), 7.53 (d,  $J = 1.7$  Hz, 1H), 7.33 (dd,  $J = 5.3, 1.8$  Hz, 1H), 4.93 (s, 1H).

$^{13}\text{C}$  NMR (126 MHz,  $\text{CDCl}_3$ )  $\delta$  152.66, 149.64, 145.70, 124.90, 122.24, 74.36, 57.01.

$^{11}\text{B}$  NMR (160 MHz,  $\text{CDCl}_3$ )  $\delta$  -0.60 – -4.98 (m, 2B), -6.58 – -15.20 (m, 8B).

$^{11}\text{B}\{^1\text{H}\}$  NMR (160 MHz,  $\text{CDCl}_3$ )  $\delta$  -3.07 (s, 1B), -3.68 (s, 1B), -8.33 (s, 2B), -10.69 (s, 2B), -11.55 (s, 2B), -13.26 (s, 2B).

HRMS:  $m/z$  calcd for  $\text{C}_7\text{H}_{14}^{10}\text{B}_2^{11}\text{B}_8\text{ClN}$   $[\text{M}]^+$ : 255.1818. Found: 255.1815.

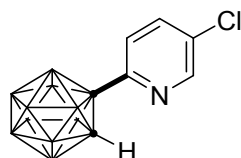

**3d:** Yield 70%. Colorless liquids.

$^1\text{H}$  NMR (500 MHz,  $\text{CDCl}_3$ )  $\delta$  8.37 (d,  $J = 2.4$  Hz, 1H), 7.68 (dd,  $J = 8.5, 2.4$  Hz, 1H), 7.49 (d,  $J = 8.5$  Hz, 1H), 4.89 (s, 1H).

$^{13}\text{C}$  NMR (126 MHz,  $\text{CDCl}_3$ )  $\delta$  149.40, 147.82, 137.24, 133.40, 122.51, 74.51, 57.09.

$^{11}\text{B}$  NMR (160 MHz,  $\text{CDCl}_3$ )  $\delta$  -3.52 (t,  $J = 141.7$  Hz, 2B), -7.37 – -15.33 (m, 8B).

$^{11}\text{B}\{^1\text{H}\}$  NMR (160 MHz,  $\text{CDCl}_3$ )  $\delta$  -3.06 (s, 1B), -3.80 (s, 1B), -8.33 (s, 2B), -10.65 (s, 2B), -11.50 (s, 2B), -13.21 (s, 2B).

HRMS:  $m/z$  calcd for  $\text{C}_7\text{H}_{14}^{10}\text{B}_2^{11}\text{B}_8\text{ClN}$   $[\text{M}]^+$ : 255.1818. Found: 255.1819.

The NMR data are consistent with the reported ones.<sup>[1]</sup>

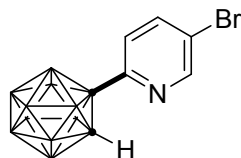

**3e:** Yield 80%. Colorless crystals, mp 129-130 °C.

$^1\text{H}$  NMR (500 MHz,  $\text{CDCl}_3$ )  $\delta$  8.47 (dd,  $J = 2.3, 0.6$  Hz, 1H), 7.82 (dd,  $J = 8.5, 2.3$  Hz, 1H), 7.43 (dd,  $J = 8.5, 0.6$  Hz, 1H), 4.89 (s, 1H).

$^{13}\text{C}$  NMR (126 MHz,  $\text{CDCl}_3$ )  $\delta$  150.02, 149.82, 140.11, 122.93, 122.01, 74.53, 57.01.

$^{11}\text{B}$  NMR (160 MHz,  $\text{CDCl}_3$ )  $\delta$  -3.42 (t,  $J = 136.0$  Hz, 2B), -6.87 – -15.53 (m, 8B).

$^{11}\text{B}\{^1\text{H}\}$  NMR (160 MHz,  $\text{CDCl}_3$ )  $\delta$  -2.99 (s, 1B), -3.75 (s, 1B), -8.28 (s, 2B), -10.61 (s, 2B), -11.49 (s, 2B), -13.18 (s, 2B).

HRMS:  $m/z$  calcd for  $\text{C}_7\text{H}_{14}^{10}\text{B}_2^{11}\text{B}_8\text{BrN}$   $[\text{M}]^+$ : 299.1313. Found: 299.1310.

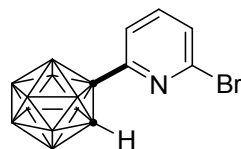

**3f:** Yield 85%. Colorless crystals, mp 122-124 °C.

$^1\text{H}$  NMR (500 MHz,  $\text{CDCl}_3$ )  $\delta$  7.55 (d,  $J = 7.1$  Hz, 1H), 7.50 (d,  $J = 6.1$  Hz, 2H), 4.87 (s, 1H).

$^{13}\text{C}$  NMR (126 MHz,  $\text{CDCl}_3$ )  $\delta$  152.15, 141.21, 139.62, 129.14, 120.64, 73.99, 57.07.

$^{11}\text{B}$  NMR (160 MHz,  $\text{CDCl}_3$ )  $\delta$  -0.97 – -5.33 (m, 2B), -6.78 – -15.57 (m, 8B).

$^{11}\text{B}\{^1\text{H}\}$  NMR (160 MHz,  $\text{CDCl}_3$ )  $\delta$  -3.04 (s, 1B), -3.64 (s, 1B), -8.26 (s, 2B), -10.67 (s, 2B), -11.47 (s, 2B), -13.21 (s, 2B).

HRMS:  $m/z$  calcd for  $\text{C}_7\text{H}_{14}^{10}\text{B}_2^{11}\text{B}_8\text{BrN}$   $[\text{M}]^+$ : 299.1313. Found: 299.1314.

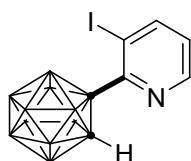

**3g**: Yield 67%. Colorless crystals, mp 125-126 °C.

$^1\text{H}$  NMR (500 MHz,  $\text{CDCl}_3$ )  $\delta$  8.41 (dd,  $J$  = 4.5, 1.6 Hz, 1H), 8.34 (dd,  $J$  = 8.0, 1.6 Hz, 1H), 6.95 (dd,  $J$  = 8.0, 4.5 Hz, 1H), 5.59 (s, 1H).

$^{13}\text{C}$  NMR (126 MHz,  $\text{CDCl}_3$ )  $\delta$  152.82, 148.17, 147.44, 124.87, 88.89, 76.75, 60.95.

$^{11}\text{B}$  NMR (160 MHz,  $\text{CDCl}_3$ )  $\delta$  -2.73 (t,  $J$  = 135.5 Hz, 2B), -7.09 – -15.91 (m, 8B).

$^{11}\text{B}\{^1\text{H}\}$  NMR (160 MHz,  $\text{CDCl}_3$ )  $\delta$  -2.36 (s, 1B), -3.12 (s, 1B), -8.48 (s, 2B), -9.85 (s, 2B), -11.52 (s, 2B), -13.46 (s, 2B).

HRMS:  $m/z$  calcd for  $\text{C}_7\text{H}_{14}^{10}\text{B}_2^{11}\text{B}_8\text{IN}$   $[\text{M}]^+$ : 347.1174. Found: 347.1176.

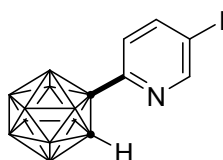

**3h**: Yield 84%. Colorless crystals, mp 116-117 °C.

$^1\text{H}$  NMR (500 MHz,  $\text{CDCl}_3$ )  $\delta$  8.62 (d,  $J$  = 2.1 Hz, 1H), 8.01 (dd,  $J$  = 8.4, 2.1 Hz, 1H), 7.32 (d,  $J$  = 8.4 Hz, 1H), 4.88 (s, 1H).

$^{13}\text{C}$  NMR (126 MHz,  $\text{CDCl}_3$ )  $\delta$  154.97, 150.32, 145.78, 123.32, 94.38, 74.61, 56.86.

$^{11}\text{B}$  NMR (160 MHz,  $\text{CDCl}_3$ )  $\delta$  -3.43 (t,  $J$  = 134.1 Hz), -6.40 – -16.96 (m).

$^{11}\text{B}\{^1\text{H}\}$  NMR (160 MHz,  $\text{CDCl}_3$ )  $\delta$  -3.07 (s, 1B), -3.84 (s, 1B), -8.35 (s, 2B), -10.69 (s, 2B), -11.58 (s, 2B), -13.26 (s, 2B).

HRMS:  $m/z$  calcd for  $\text{C}_7\text{H}_{14}^{10}\text{B}_2^{11}\text{B}_8\text{IN}$   $[\text{M}]^+$ : 347.1174. Found: 347.1173.

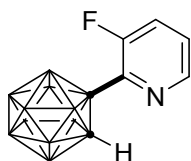

**3i**: Yield 69%. Colorless crystals, mp 82-83 °C.

$^1\text{H}$  NMR (500 MHz,  $\text{CDCl}_3$ )  $\delta$  8.27 (d,  $J$  = 4.5 Hz, 1H), 7.51 – 7.43 (m, 1H), 7.37 (ddd,  $J$  = 8.3, 4.4, 3.6 Hz, 1H), 5.16 (s, 1H).

$^{13}\text{C}$  NMR (126 MHz,  $\text{CDCl}_3$ )  $\delta$  157.06 (d,  $J$  = 267.2 Hz), 144.57 (d,  $J$  = 5.4 Hz), 138.05 (d,  $J$  = 10.0 Hz), 126.26 (d,  $J$  = 4.2 Hz), 125.68 (d,  $J$  = 20.1 Hz), 71.53 (s), 58.17 (s).

$^{11}\text{B}$  NMR (160 MHz,  $\text{CDCl}_3$ )  $\delta$  -2.68 (d,  $J$  = 149.6 Hz, 2B), -6.84 – -16.64 (m, 8B).

$^{11}\text{B}\{^1\text{H}\}$  NMR (160 MHz,  $\text{CDCl}_3$ )  $\delta$  -2.66 (s, 2B), -8.52 (s, 2B), -10.26 (s, 2B), -11.43 (s, 2B), -13.39 (s, 2B).

$^{19}\text{F}$  NMR (377 MHz,  $\text{CDCl}_3$ )  $\delta$  -125.99.

HRMS:  $m/z$  calcd for  $\text{C}_7\text{H}_{14}^{10}\text{B}_2^{11}\text{B}_8\text{FN}$   $[\text{M}]^+$ : 239.2113. Found: 239.2112.

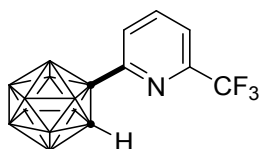

**3j:** Yield 78%. Colorless crystals, mp 115-117 °C.

$^1\text{H}$  NMR (500 MHz,  $\text{CDCl}_3$ )  $\delta$  7.93 (t,  $J = 7.9$  Hz, 1H), 7.73 (dd,  $J = 15.0, 7.9$  Hz, 2H), 4.93 (s, 1H).

$^{13}\text{C}$  NMR (126 MHz,  $\text{CDCl}_3$ )  $\delta$  151.84 (s), 147.50 (dd,  $J = 71.8, 36.0$  Hz), 139.20 (s), 124.37 (s), 121.02 (dd,  $J = 5.2, 2.6$  Hz), 120.72 (q,  $J = 274.4$  Hz), 73.94 (s), 56.84 (s).

$^{11}\text{B}$  NMR (160 MHz,  $\text{CDCl}_3$ )  $\delta$  -1.09 – -5.37 (m, 2B), -6.56 – -15.93 (m, 8B).

$^{11}\text{B}\{^1\text{H}\}$  NMR (160 MHz,  $\text{CDCl}_3$ )  $\delta$  -2.85 (s, 1B), -3.44 (s, 1B), -8.19 (s, 2B), -10.54 (s, 2B), -11.55 (s, 2B), -13.08 (s, 2B).

$^{19}\text{F}$  NMR (471 MHz,  $\text{CDCl}_3$ )  $\delta$  -68.11.

HRMS:  $m/z$  calcd for  $\text{C}_8\text{H}_{14}^{10}\text{B}_2^{11}\text{B}_8\text{F}_3\text{N}$   $[\text{M}]^+$ : 289.2082. Found: 289.2085.

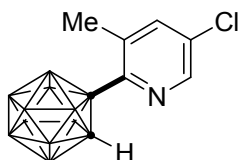

**3k:** Yield 88%. Colorless crystals, mp 141-142 °C.

$^1\text{H}$  NMR (500 MHz,  $\text{CDCl}_3$ )  $\delta$  8.24 (d,  $J = 2.2$  Hz, 1H), 7.52 (d,  $J = 2.0$  Hz, 1H), 5.47 (s, 1H), 2.63 (s, 3H).

$^{13}\text{C}$  NMR (126 MHz,  $\text{CDCl}_3$ )  $\delta$  145.57, 144.99, 140.92, 133.66, 132.54, 75.94, 61.17, 20.92.

$^{11}\text{B}$  NMR (160 MHz,  $\text{CDCl}_3$ )  $\delta$  -0.23 – -4.72 (m), -6.45 – -15.58 (m).

$^{11}\text{B}\{^1\text{H}\}$  NMR (160 MHz,  $\text{CDCl}_3$ )  $\delta$  -2.53 (s, 1B), -3.00 (s, 1B), -8.48 (s, 2B), -9.84 (s, 2B), -12.14 (s, 2B), -13.32 (s, 2B).

HRMS:  $m/z$  calcd for  $\text{C}_8\text{H}_{16}^{10}\text{B}_2^{11}\text{B}_8\text{ClN}$   $[\text{M}]^+$ : 269.1974. Found: 269.1971.

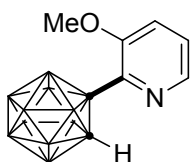

**3l:** Yield 60%. Colorless crystals, mp 134-135 °C.

$^1\text{H}$  NMR (500 MHz,  $\text{CDCl}_3$ )  $\delta$  8.04 (dd,  $J = 4.4, 1.4$  Hz, 1H), 7.27 (qd,  $J = 8.4, 2.9$  Hz, 2H), 5.30 (s, 1H), 3.86 (s, 3H).

$^{13}\text{C}$  NMR (126 MHz,  $\text{CDCl}_3$ )  $\delta$  153.86, 140.35, 138.48, 125.57, 120.39, 73.82, 58.95, 55.65.

$^{11}\text{B}$  NMR (160 MHz,  $\text{CDCl}_3$ )  $\delta$  -3.00 (d,  $J = 146.8$  Hz, 2B), -6.92 – -16.99 (m, 8B).

$^{11}\text{B}\{^1\text{H}\}$  NMR (160 MHz,  $\text{CDCl}_3$ )  $\delta$  -2.91 (s, 2B), -9.04 (s, 2B), -10.09 (s, 2B), -11.08 (s, 2B), -13.68 (s, 2B).

HRMS:  $m/z$  calcd for  $\text{C}_8\text{H}_{17}^{10}\text{B}_2^{11}\text{B}_8\text{NO}$   $[\text{M}]^+$ : 251.2313. Found: 251.2310.

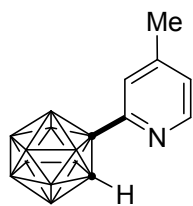

**3m:** Yield 36%. Colorless crystals, mp 88-89 °C.

$^1\text{H}$  NMR (500 MHz,  $\text{CDCl}_3$ )  $\delta$  8.25 (d,  $J = 5.0$  Hz, 1H), 7.33 (s, 1H), 7.11 (dd,  $J = 5.0, 0.7$  Hz, 1H), 4.98 (s, 1H), 2.38 (s, 3H).

$^{13}\text{C}$  NMR (126 MHz,  $\text{CDCl}_3$ )  $\delta$  151.03, 149.03, 148.52, 125.38, 122.43, 75.50, 57.05, 21.24.

$^{11}\text{B}$  NMR (160 MHz,  $\text{CDCl}_3$ )  $\delta$  -3.71 (t,  $J = 139.8$  Hz, 2B), -7.50 – -14.57 (m, 8B).

$^{11}\text{B}\{^1\text{H}\}$  NMR (160 MHz,  $\text{CDCl}_3$ )  $\delta$  -3.32 (s, 1B), -4.14 (s, 1B), -8.55 (s, 2B), -10.68 (s, 2B), -11.54 (s, 2B), -13.43 (s, 2B).

HRMS:  $m/z$  calcd for  $\text{C}_8\text{H}_{17}^{10}\text{B}_2^{11}\text{B}_8\text{N}$   $[\text{M}]^+$ : 235.2364. Found: 235.2366.

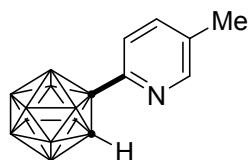

**3n:** Yield 43%. Colorless crystals, mp 130-131 °C.

$^1\text{H}$  NMR (500 MHz,  $\text{CDCl}_3$ )  $\delta$  8.22 (dd,  $J = 1.4, 0.7$  Hz, 1H), 7.52 – 7.47 (m, 1H), 7.41 (d,  $J = 8.1$  Hz, 1H), 4.95 (s, 1H), 2.34 (s, 3H).

$^{13}\text{C}$  NMR (126 MHz,  $\text{CDCl}_3$ )  $\delta$  149.21, 148.50, 137.88, 134.43, 121.09, 75.47, 57.03, 18.19.

$^{11}\text{B}$  NMR (160 MHz,  $\text{CDCl}_3$ )  $\delta$  -2.13 – -5.24 (m, 2B), -6.55 – -15.36 (m, 8B).

$^{11}\text{B}\{^1\text{H}\}$  NMR (160 MHz,  $\text{CDCl}_3$ )  $\delta$  -3.20 (s, 1B), -4.17 (s, 1B), -8.47 (s, 2B), -10.54 (s, 2B), -11.47 (s, 2B), -13.31 (s, 2B).

HRMS:  $m/z$  calcd for  $\text{C}_8\text{H}_{17}^{10}\text{B}_2^{11}\text{B}_8\text{N}$   $[\text{M}]^+$ : 235.2364. Found: 235.2362.

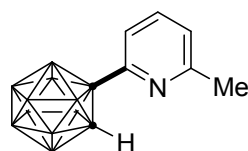

**3o:** Yield 47%. Colorless crystals, mp 89-90 °C.

$^1\text{H}$  NMR (500 MHz,  $\text{CDCl}_3$ )  $\delta$  7.56 (t,  $J = 7.8$  Hz, 1H), 7.32 (d,  $J = 7.9$  Hz, 1H), 7.14 (d,  $J = 7.7$  Hz, 1H), 5.04 (s, 1H), 2.49 (s, 3H).

$^{13}\text{C}$  NMR (126 MHz,  $\text{CDCl}_3$ )  $\delta$  158.00, 150.15, 137.36, 123.79, 118.40, 75.45, 56.71, 24.24.

$^{11}\text{B}$  NMR (160 MHz,  $\text{CDCl}_3$ )  $\delta$  -3.74 (t,  $J = 144.2$  Hz, 2B), -7.25 – -15.22 (m, 8B).

$^{11}\text{B}\{^1\text{H}\}$  NMR (160 MHz,  $\text{CDCl}_3$ )  $\delta$  -3.33 (s, 1B), -4.19 (s, 1B), -8.54 (s, 2B), -10.67 (s, 2B), -11.49 (s, 2B), -13.45 (s, 2B).

HRMS:  $m/z$  calcd for  $\text{C}_8\text{H}_{17}^{10}\text{B}_2^{11}\text{B}_8\text{N}$   $[\text{M}]^+$ : 235.2364. Found: 235.2365.

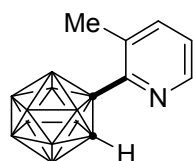



**3p:** Yield 57%. Colorless crystals, mp 122-124 °C.

$^1\text{H}$  NMR (500 MHz,  $\text{CDCl}_3$ )  $\delta$  8.26 (dd,  $J = 4.4, 1.0$  Hz, 1H), 7.48 (d,  $J = 7.7$  Hz, 1H), 7.18 (dd,  $J = 7.7, 4.6$  Hz, 1H), 5.59 (s, 1H), 2.62 (s, 3H).

$^{13}\text{C}$  NMR (126 MHz,  $\text{CDCl}_3$ )  $\delta$  147.23, 146.20, 141.76, 132.19, 124.17, 76.75, 61.05, 21.02.

$^{11}\text{B}$  NMR (160 MHz,  $\text{CDCl}_3$ )  $\delta$  -2.98 (dd,  $J = 140.1, 68.2$  Hz, 2B), -7.49 – -19.39 (m, 8B).

$^{11}\text{B}\{^1\text{H}\}$  NMR (160 MHz,  $\text{CDCl}_3$ )  $\delta$  -2.78 (s, 1B), -3.18 (s, 1B), -8.64 (s, 2B), -9.87 (s, 2B), -12.10 (s, 2B), -13.47 (s, 2B).

HRMS:  $m/z$  calcd for  $\text{C}_8\text{H}_{17}^{10}\text{B}_2^{11}\text{B}_8\text{N} [\text{M}]^+$ : 235.2364. Found: 235.2363.

The NMR data are consistent with the reported ones.<sup>[1]</sup>

### 3. References

- [1] J-Y. Lu, H. Wan, J. Zhang, Z. Wang, Y. Li, Y. Du, C. Li, Z. Liu, Z-T. Liu and J. Lu, *Chem. Eur. J.*, 2016, **22**, 17542–17546.
- [2] M. E. El-Zaria, K. Keskar, A. R. Genady, J. A. Ioppolo, J. McNulty and J. F. Valliant, *Angew. Chem. Int. Ed.*, 2014, **53**, 5156–5160; *Angew. Chem.*, 2014, **126**, 5256–5260.
- [3] F. Teixidor, A. Laromaine, R. Kivekäs, R. Sillanpää, C. Viñas, R. Vespalec and H. Horáková, *Dalton Trans.*, 2008, **3**, 345–354.
- [4] R. Coult, M. A. Fox, W. R. Gill, P. L. Herbertson, J. A. H. MacBride and K. Wade, *J. Organomet. Chem.* 1993, **462(1-2)**, 19–29.





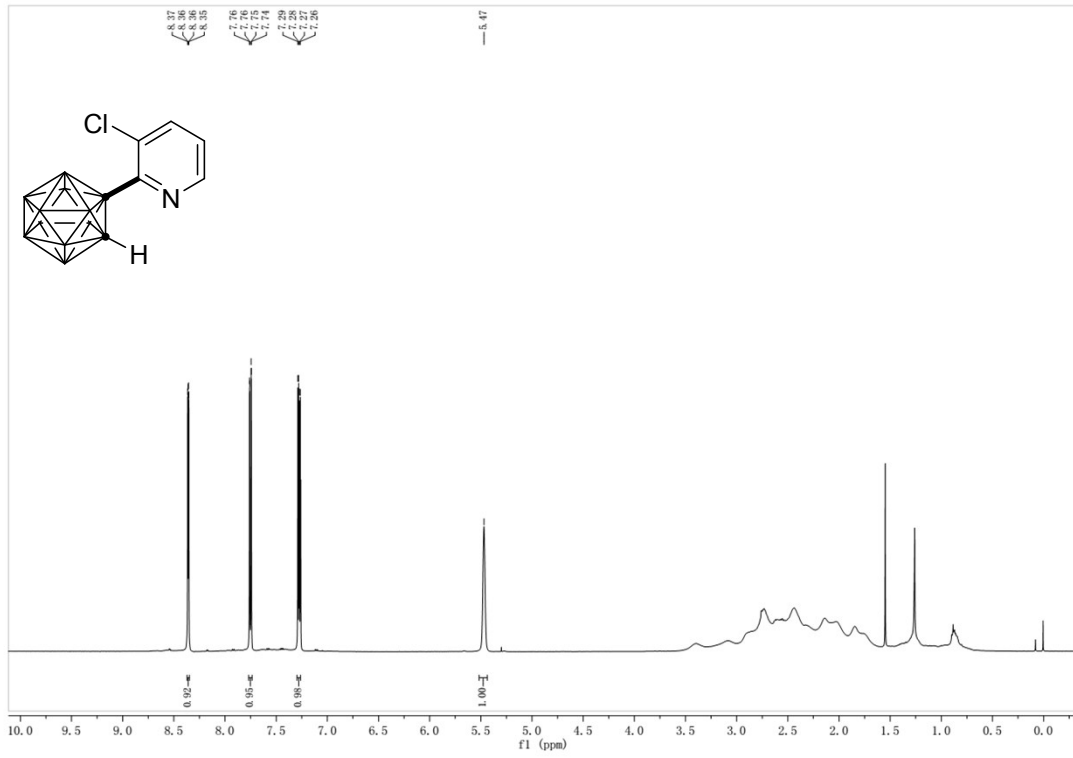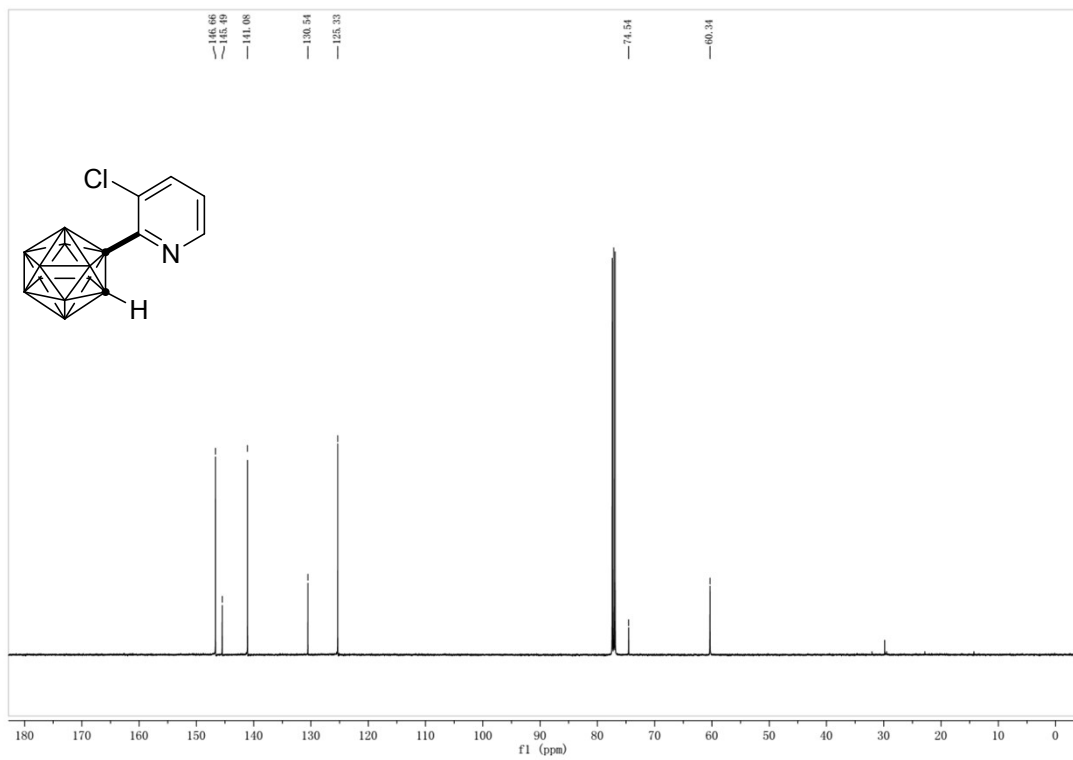

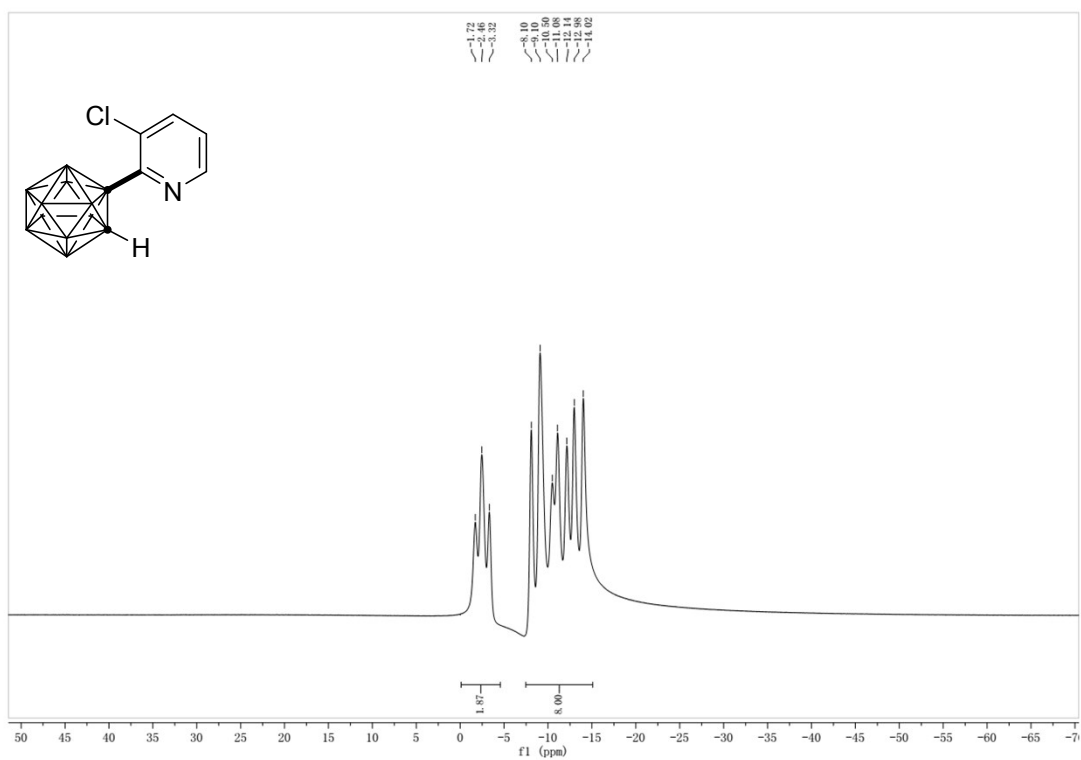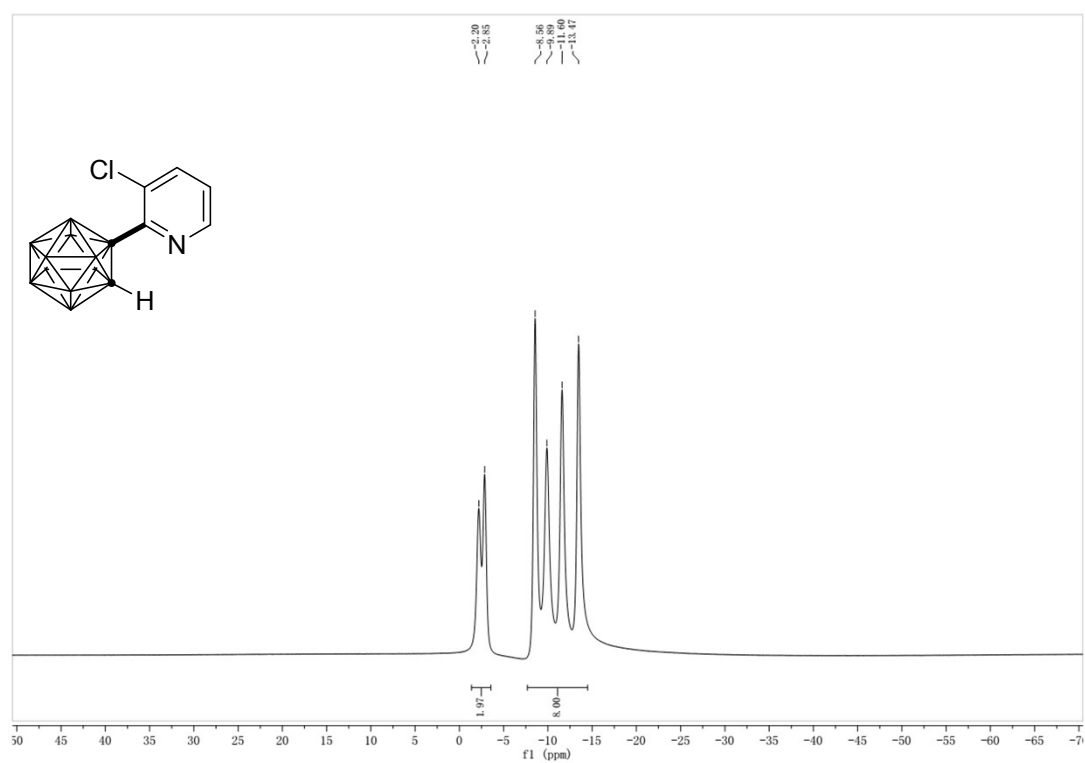

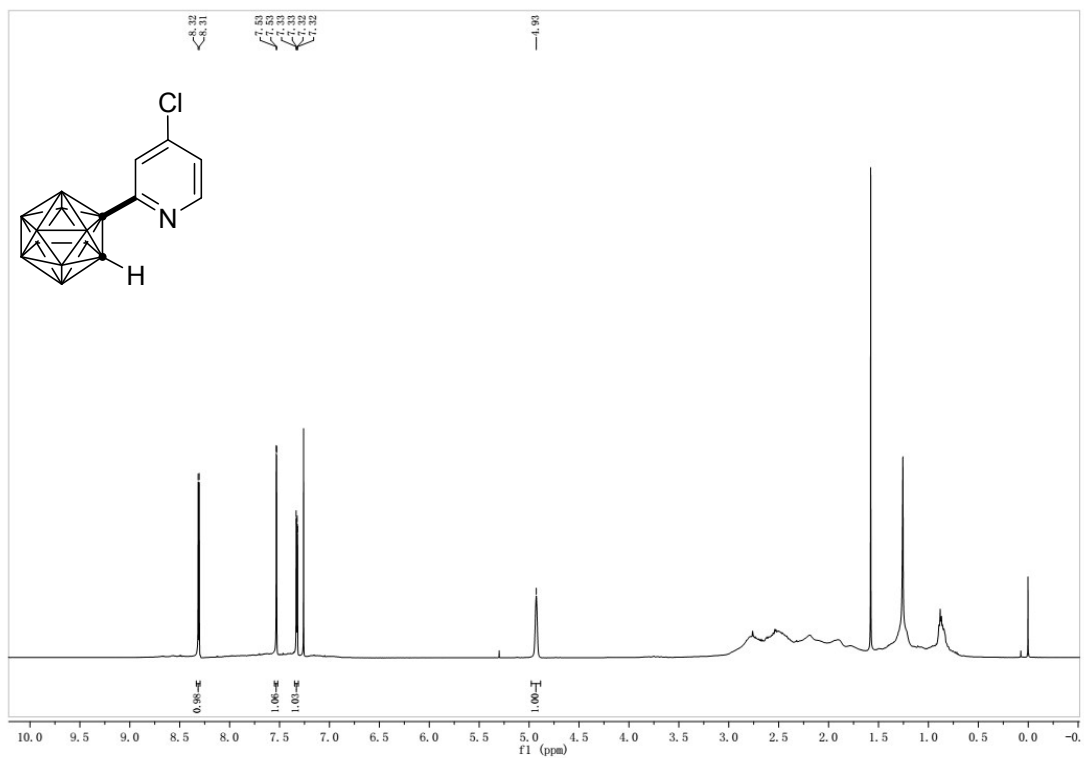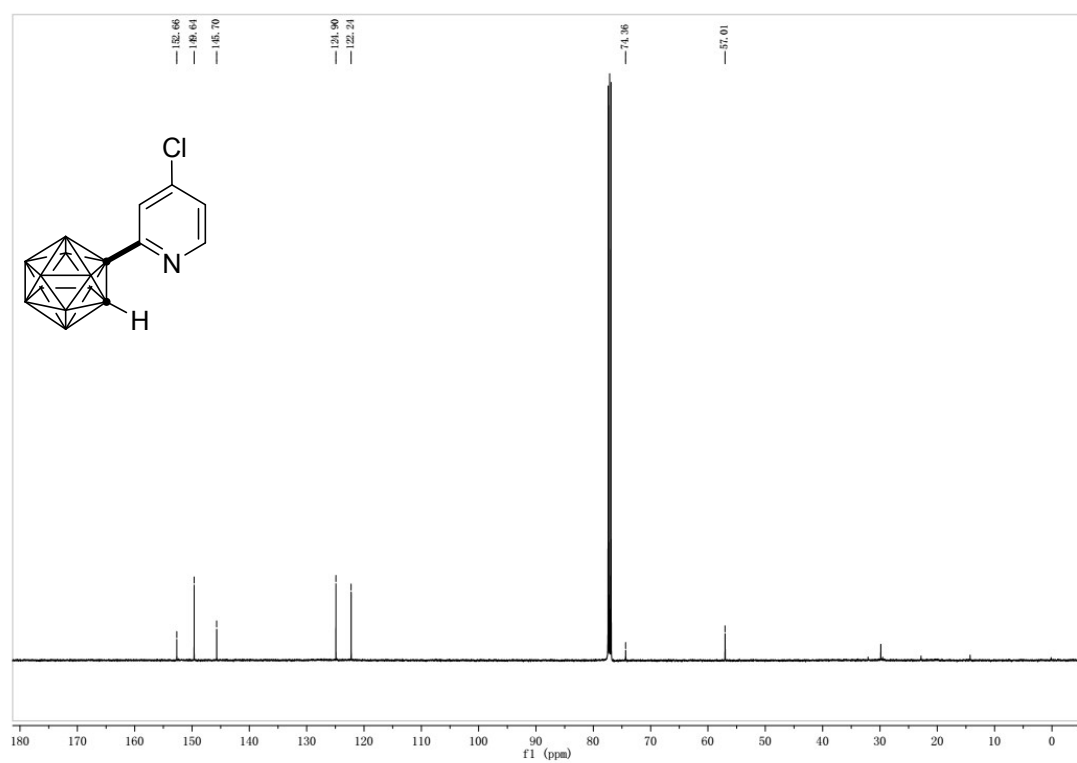

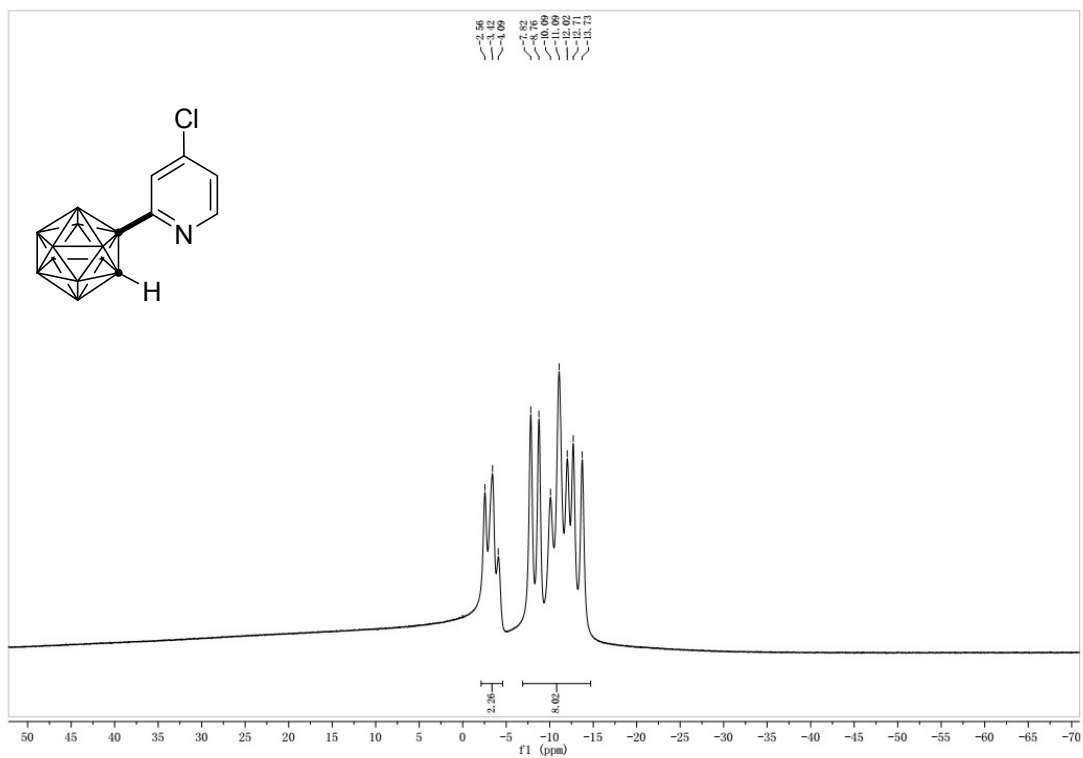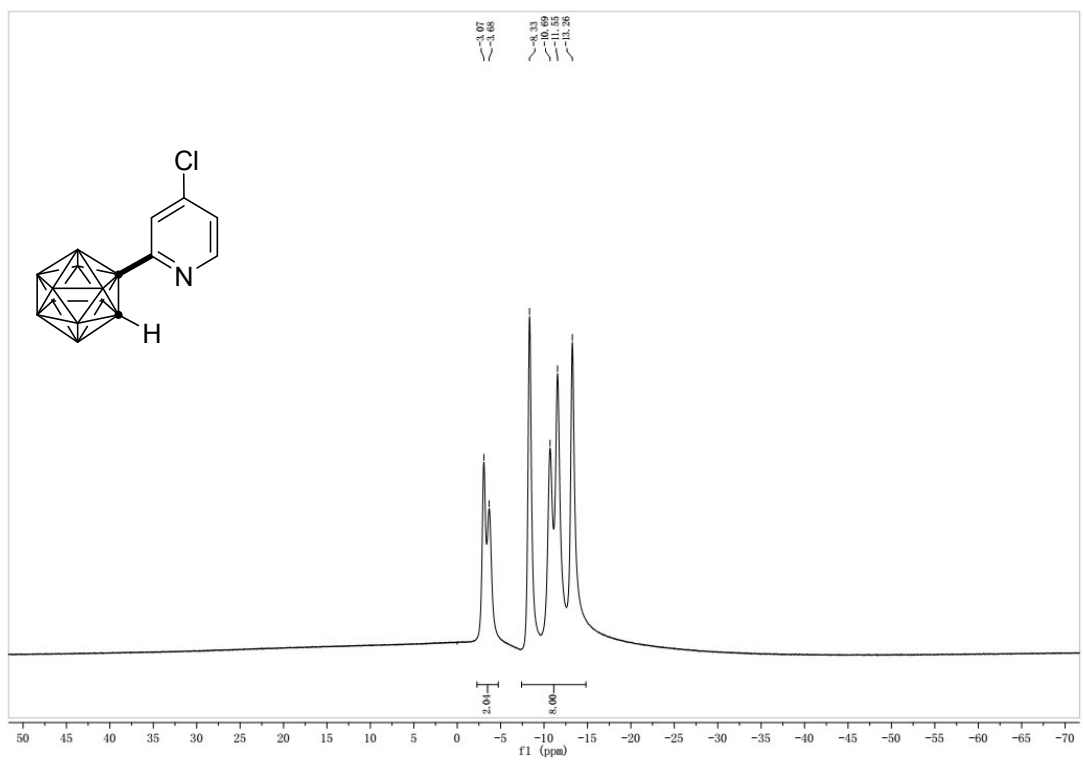



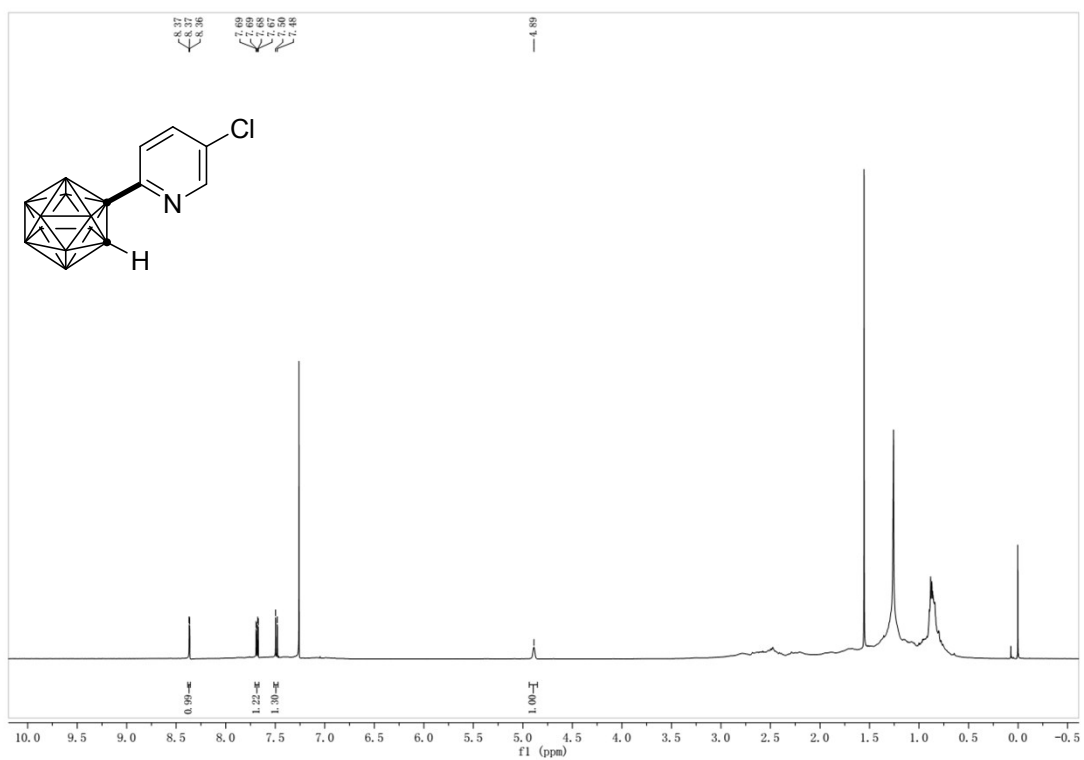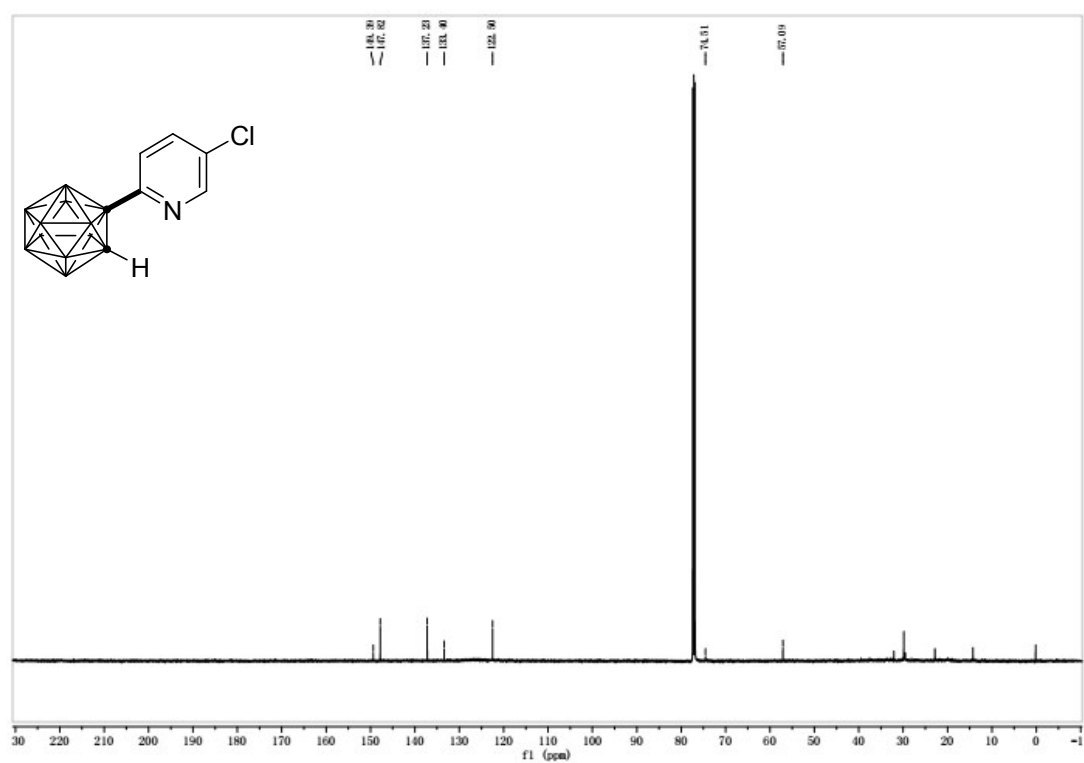

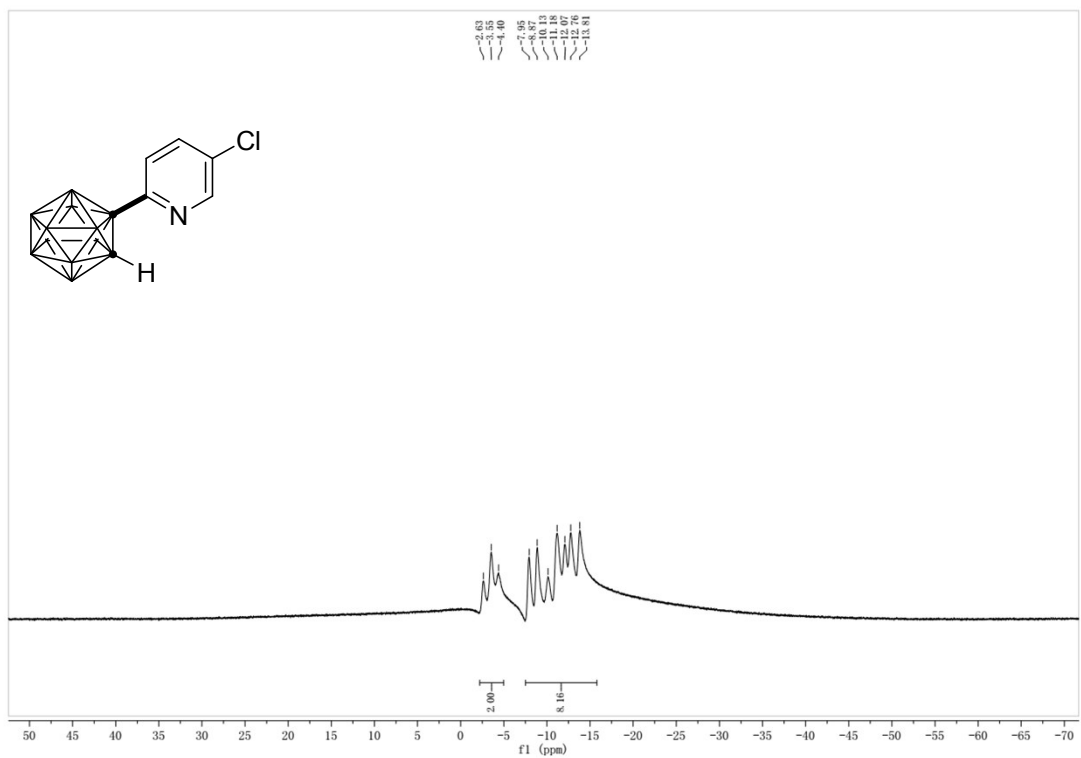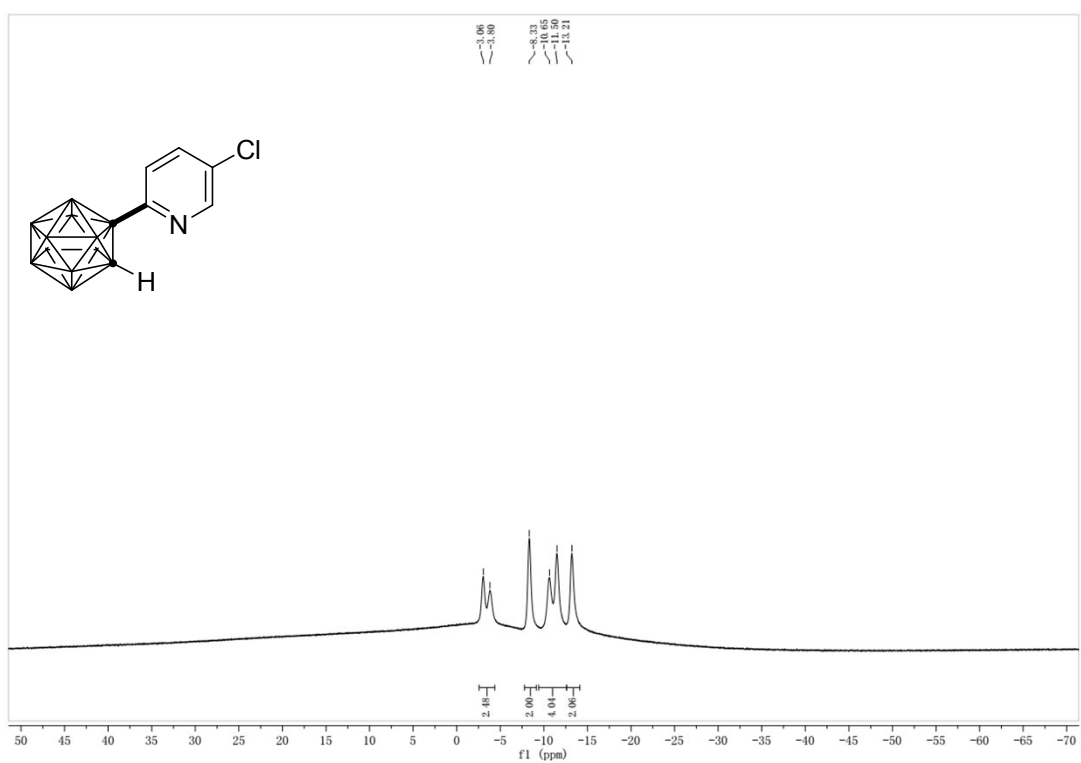



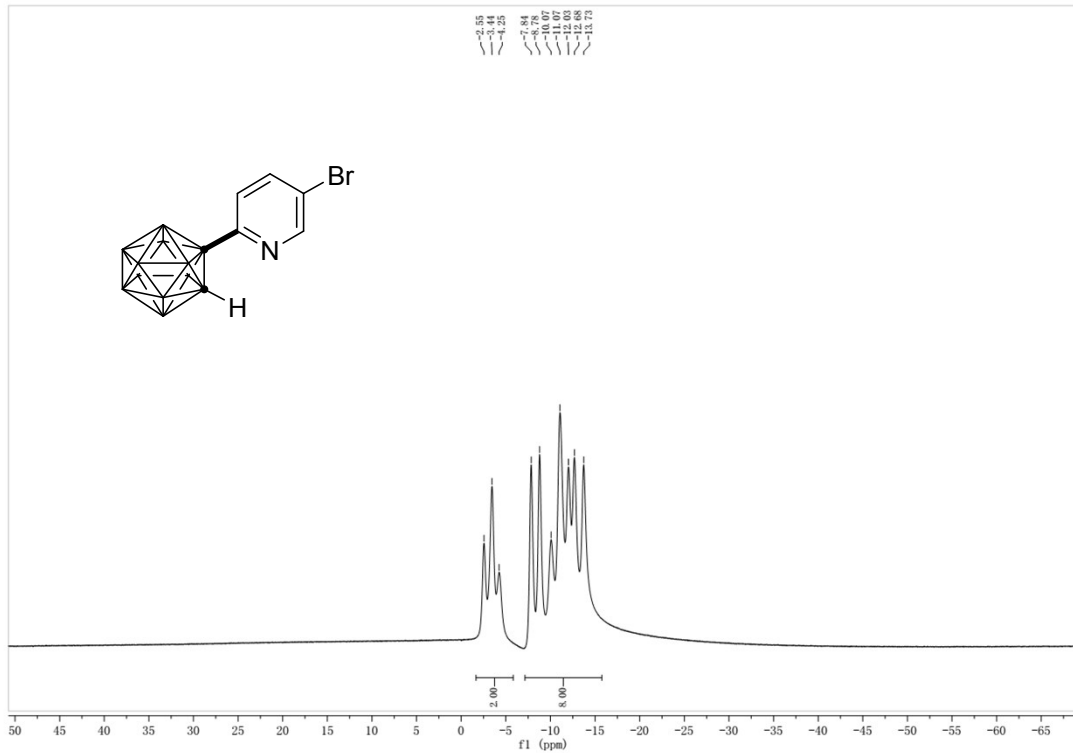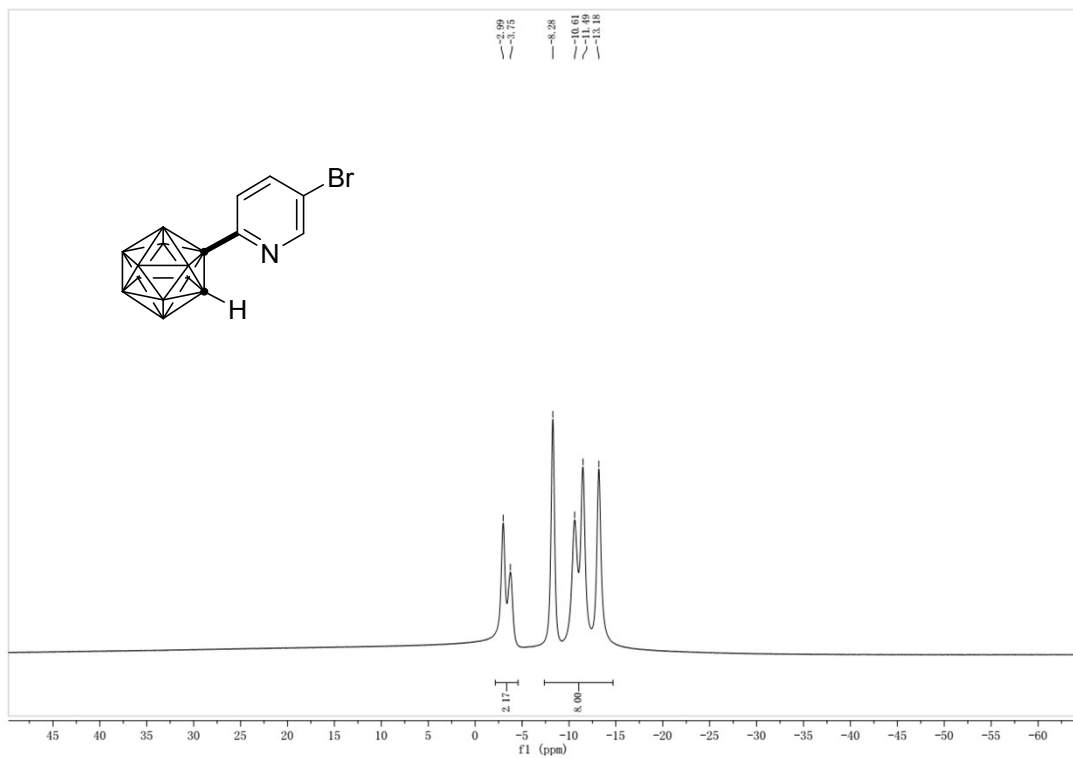



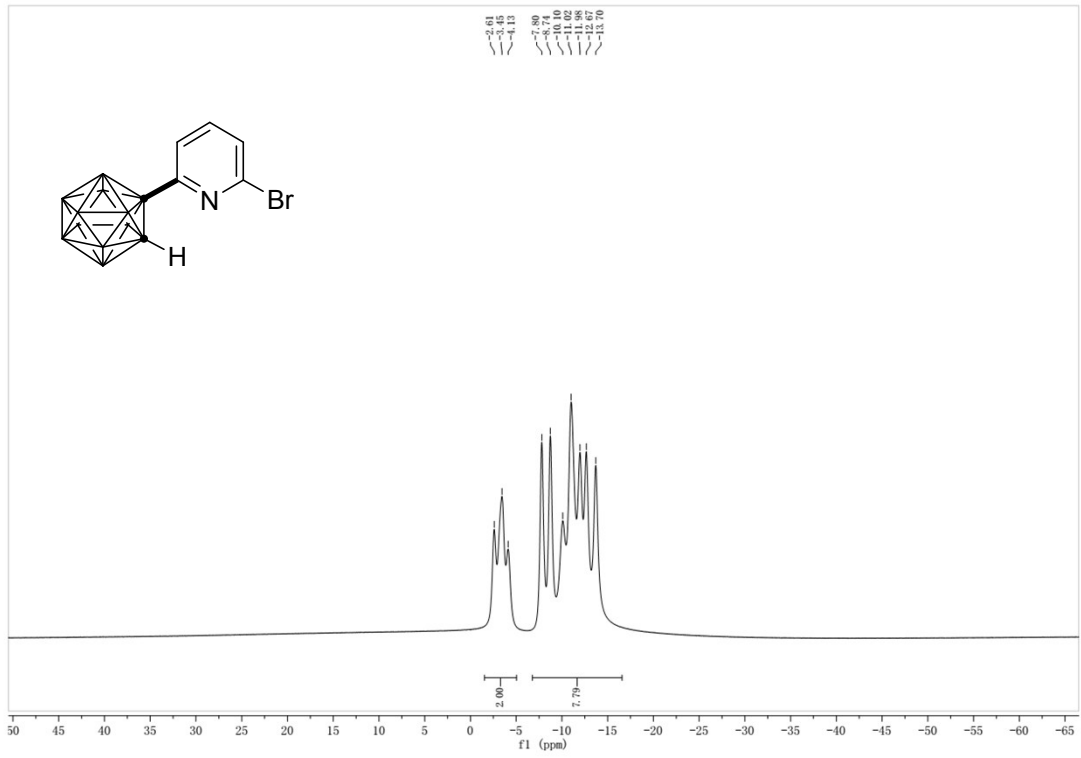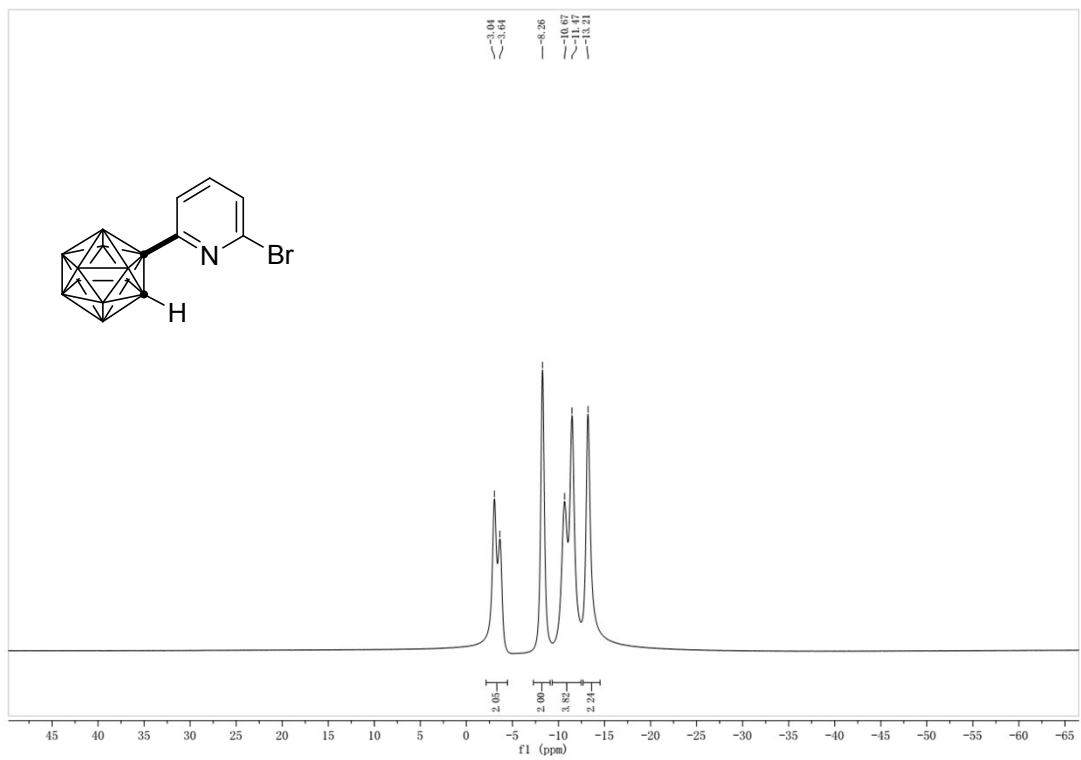



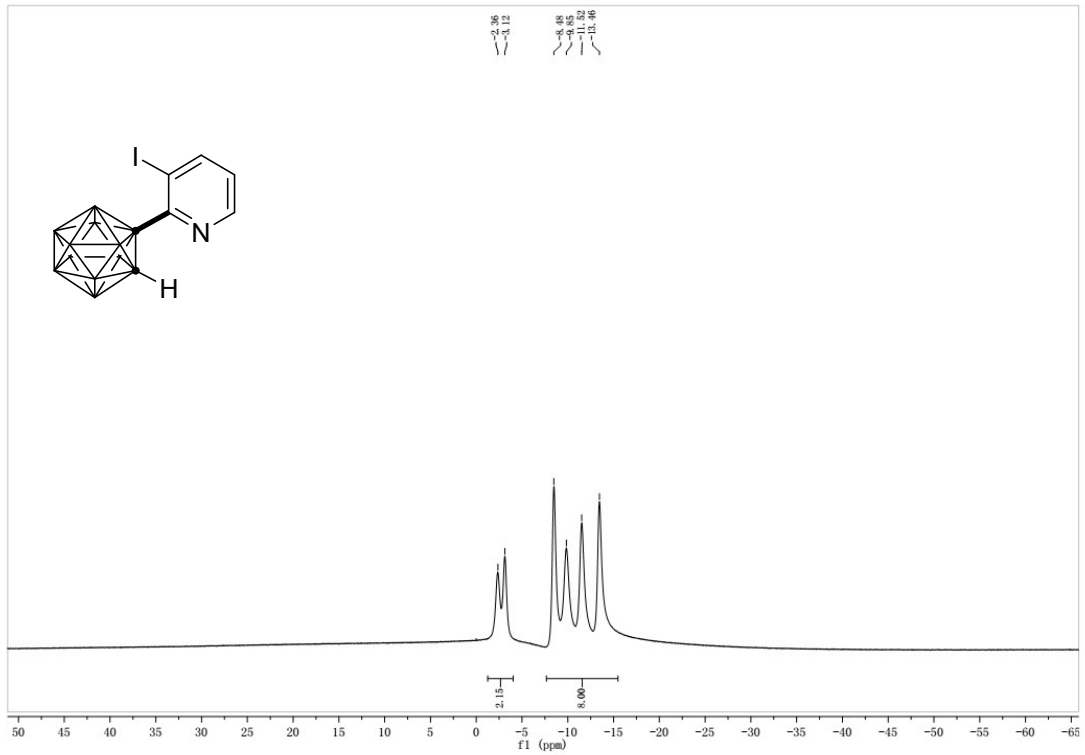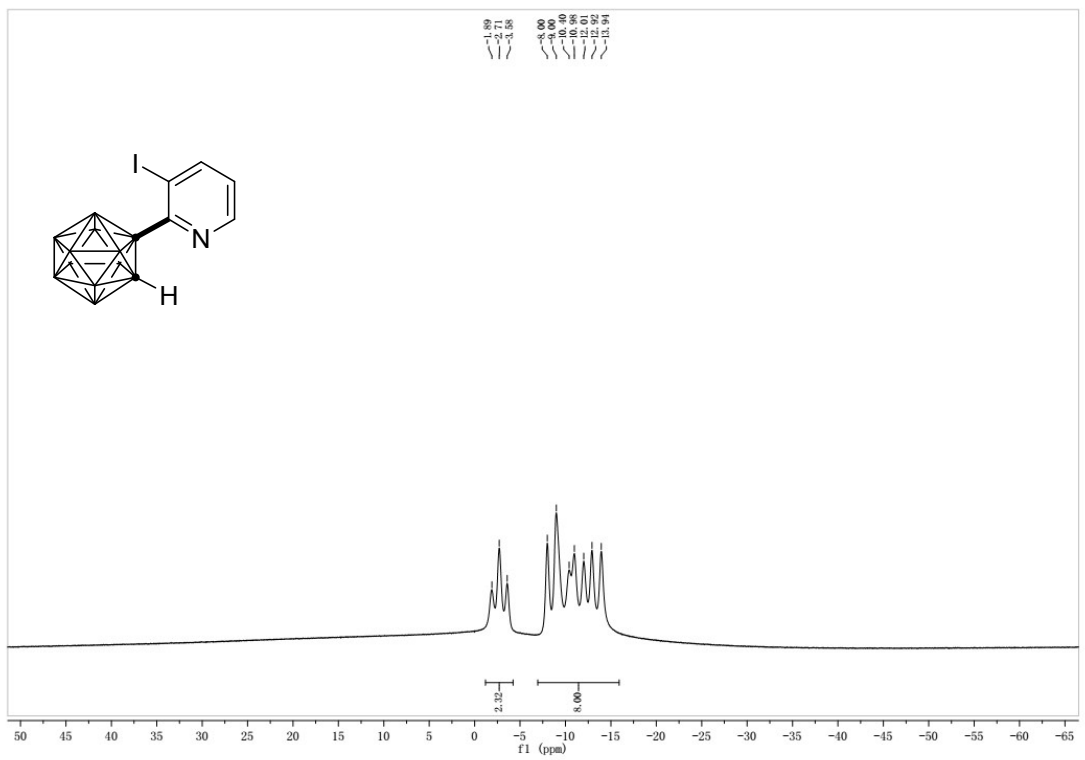





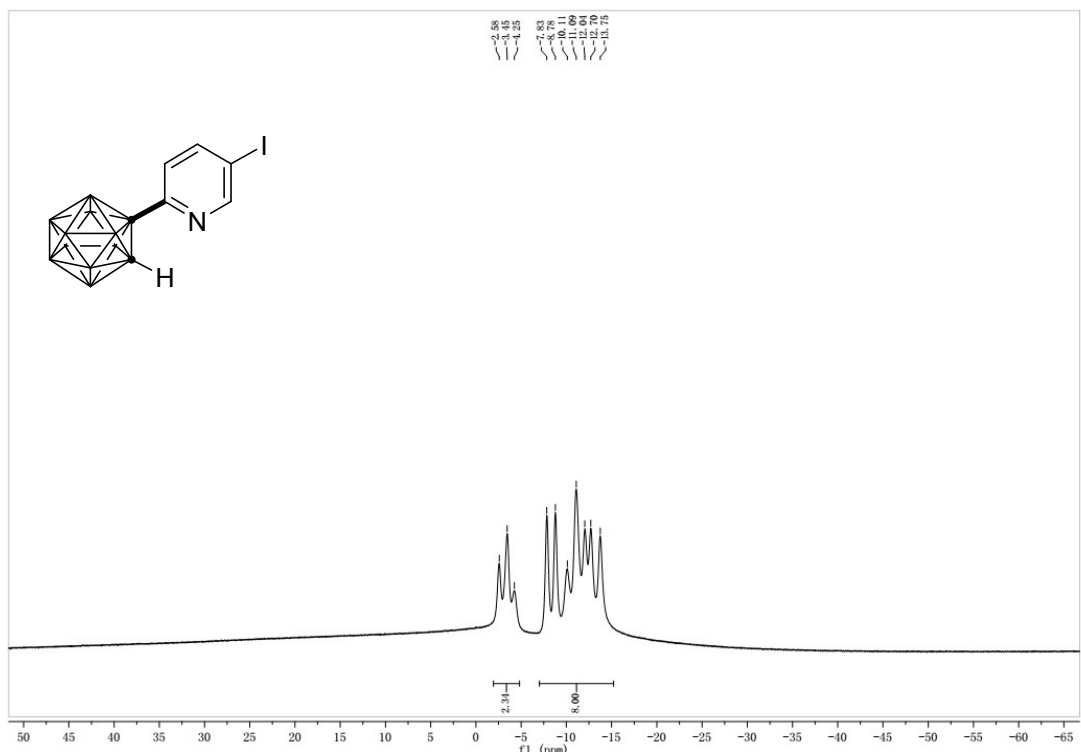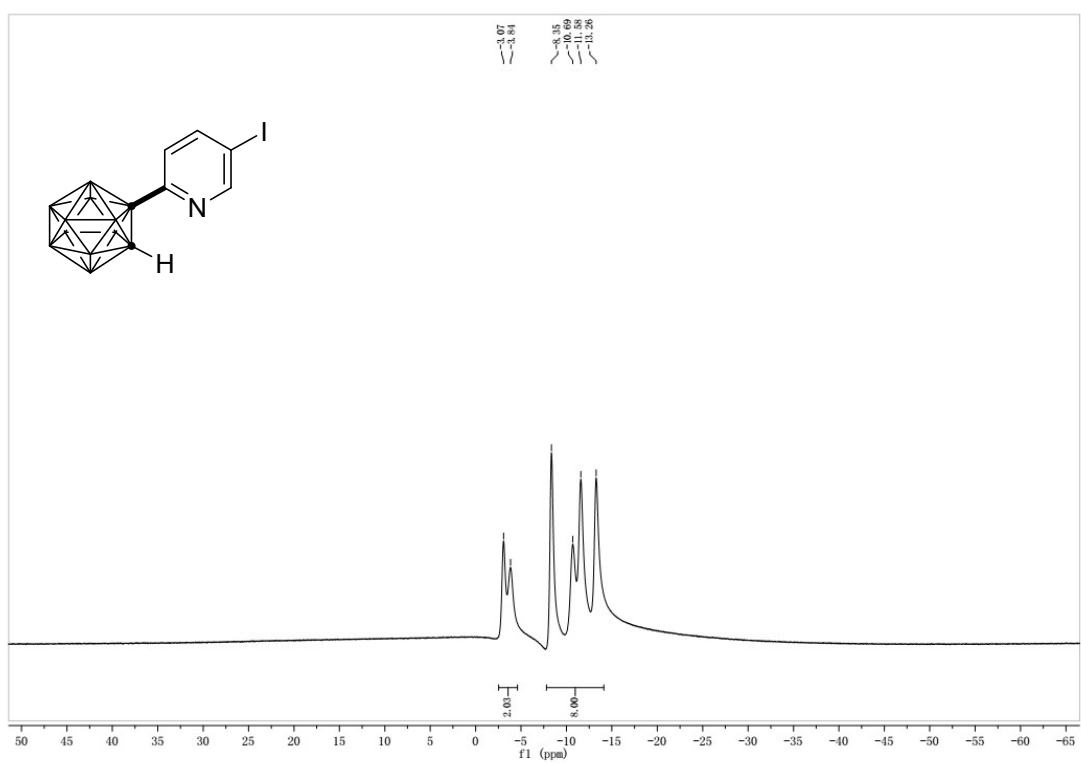





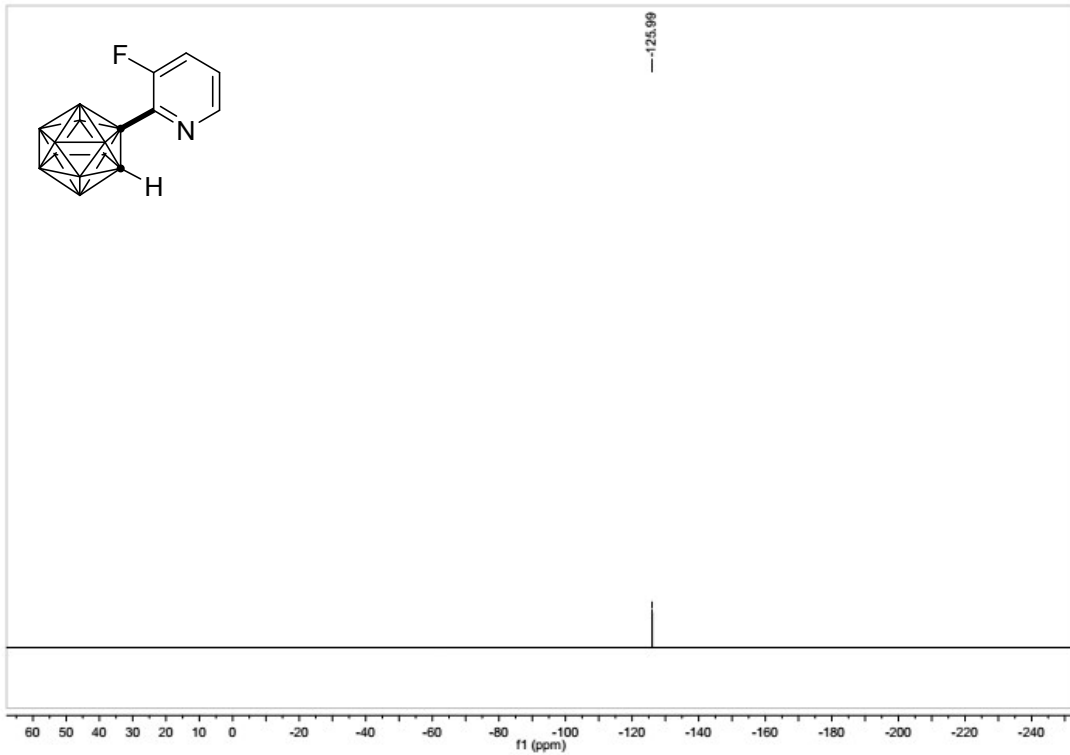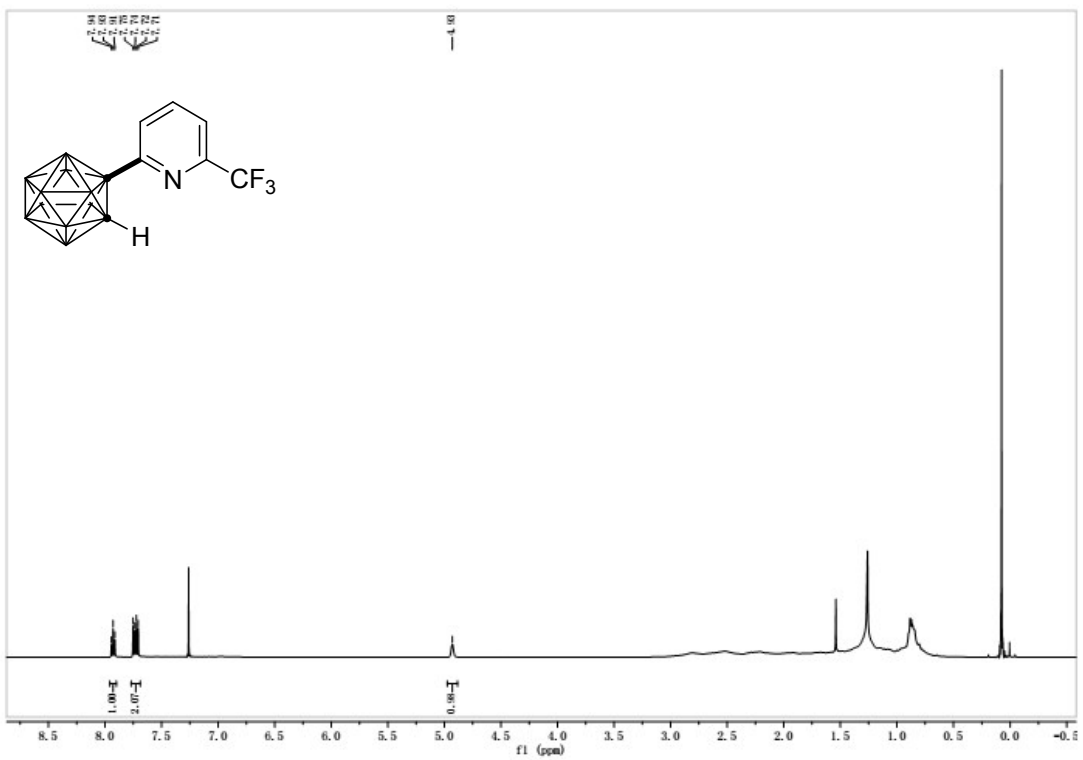

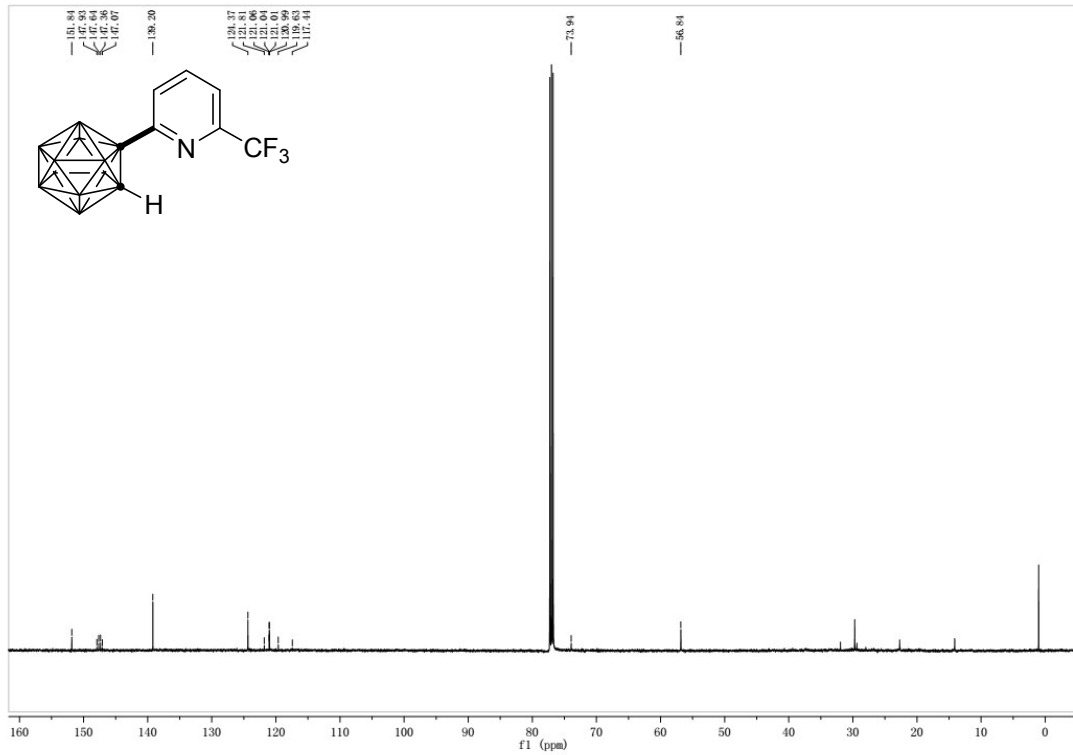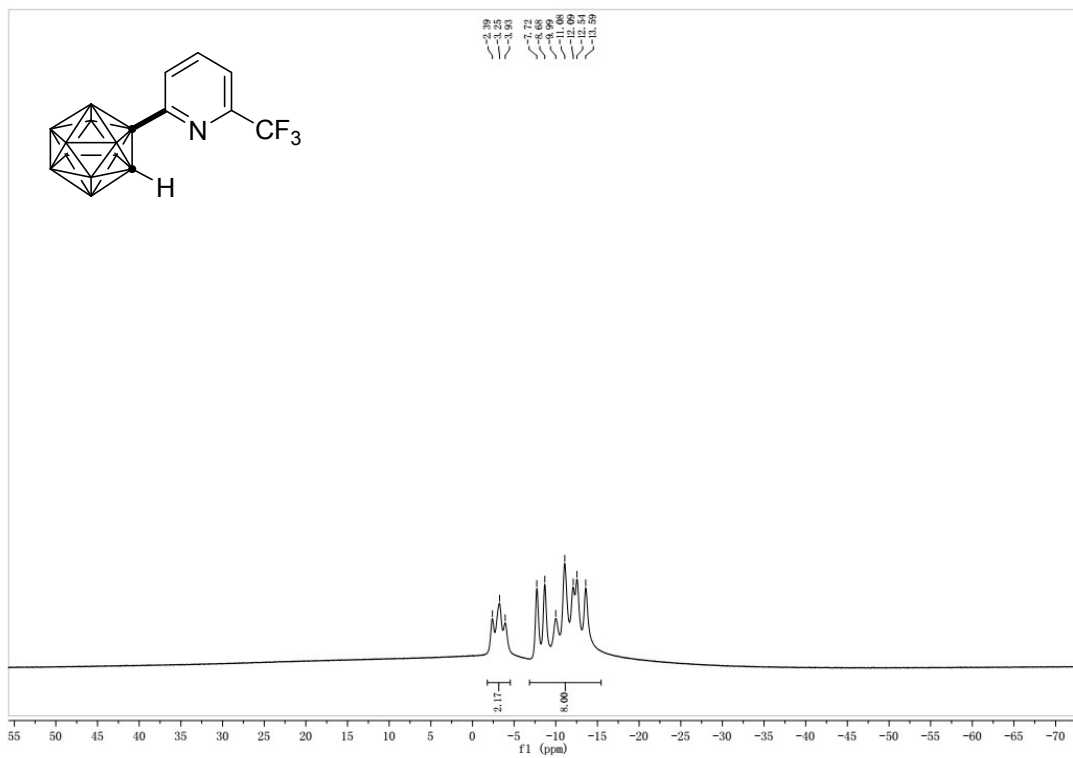







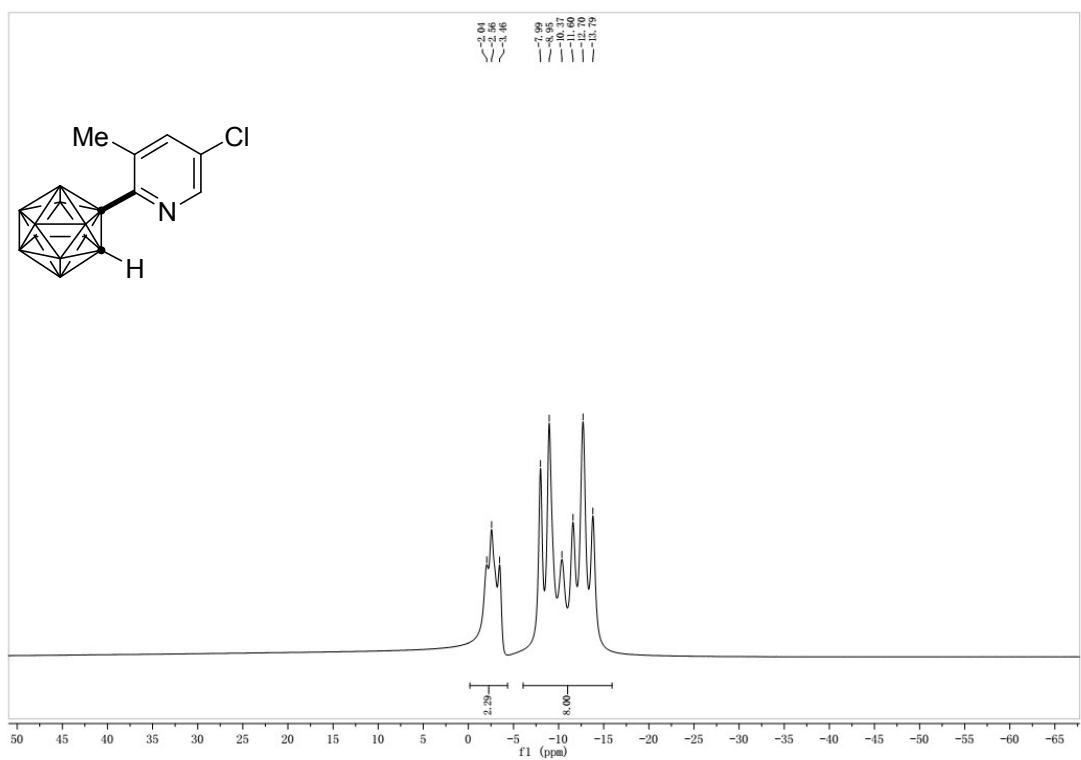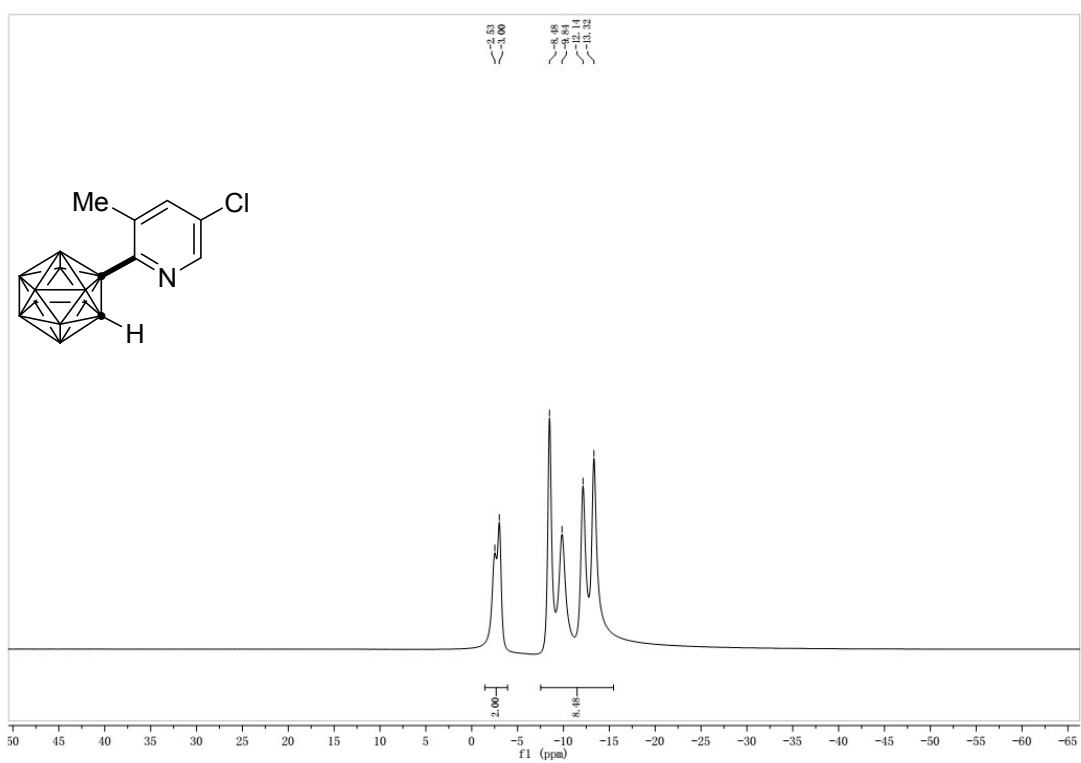

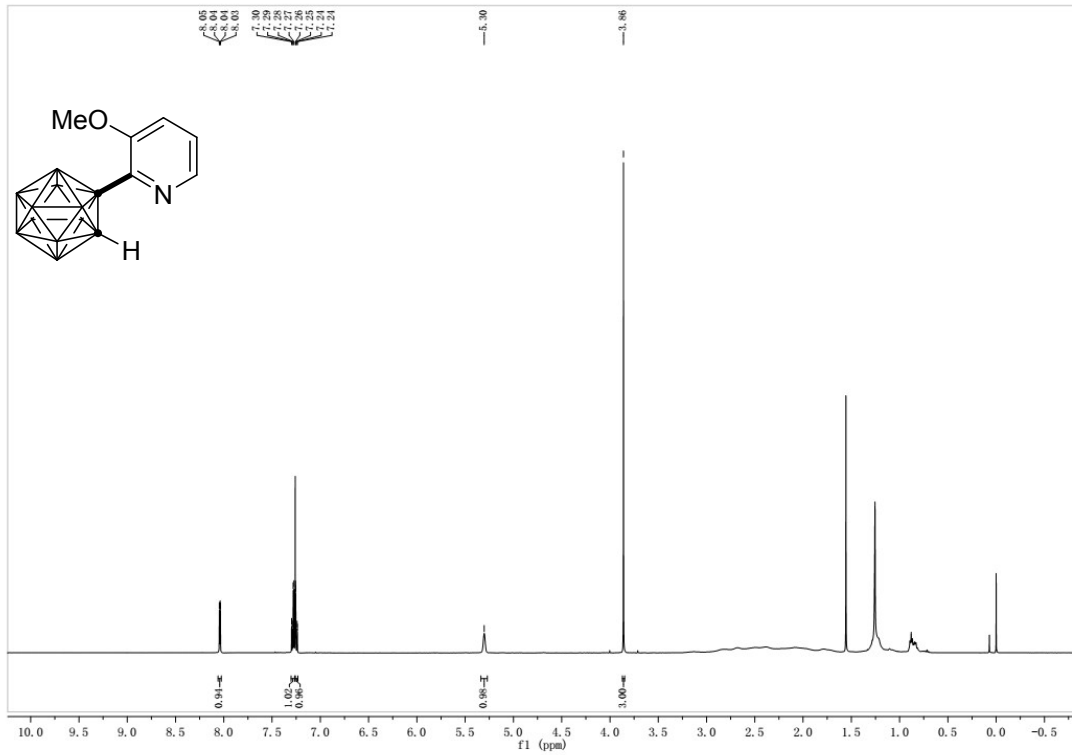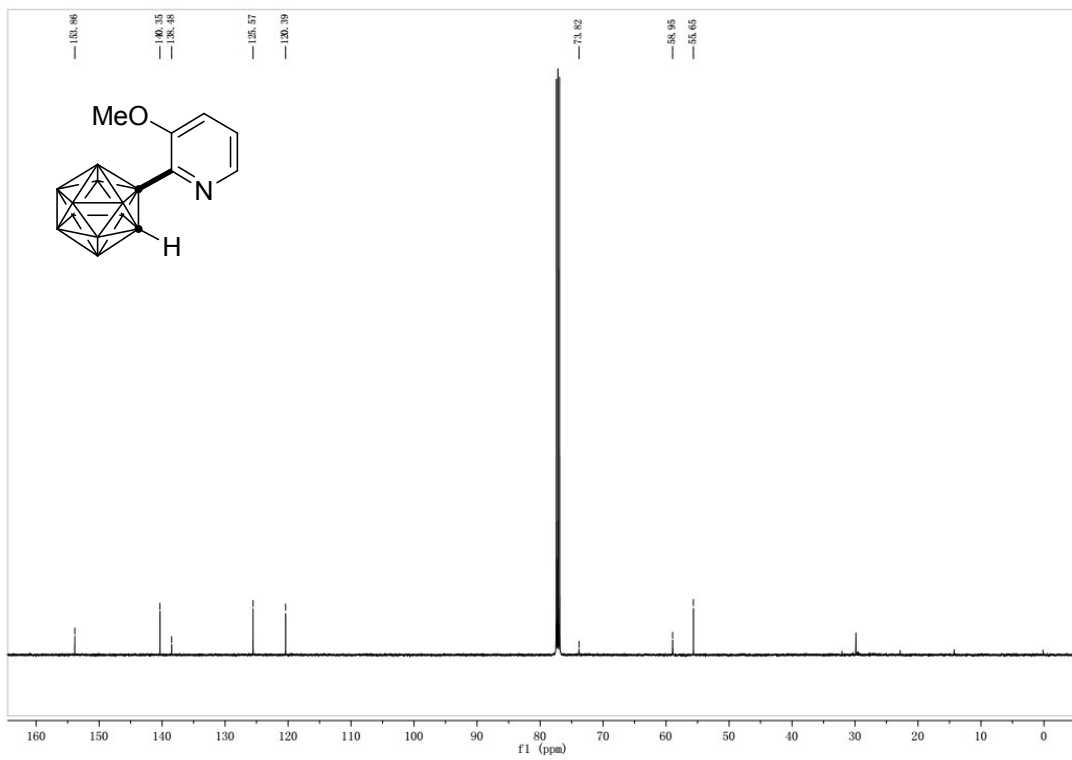

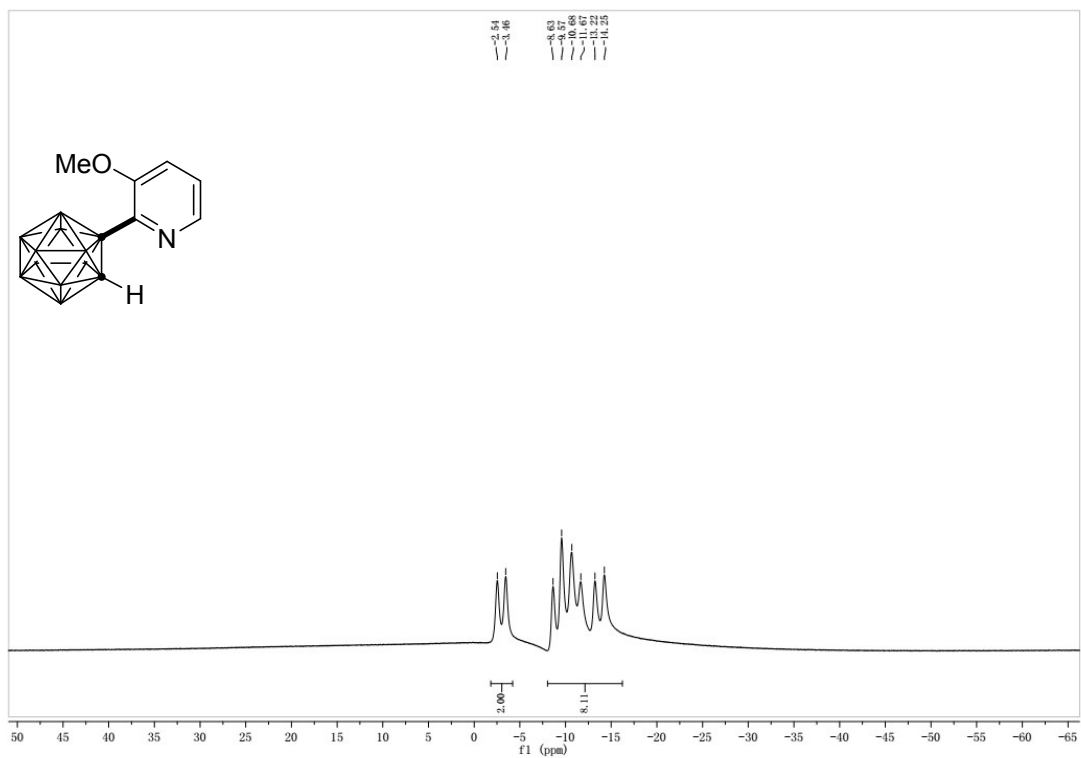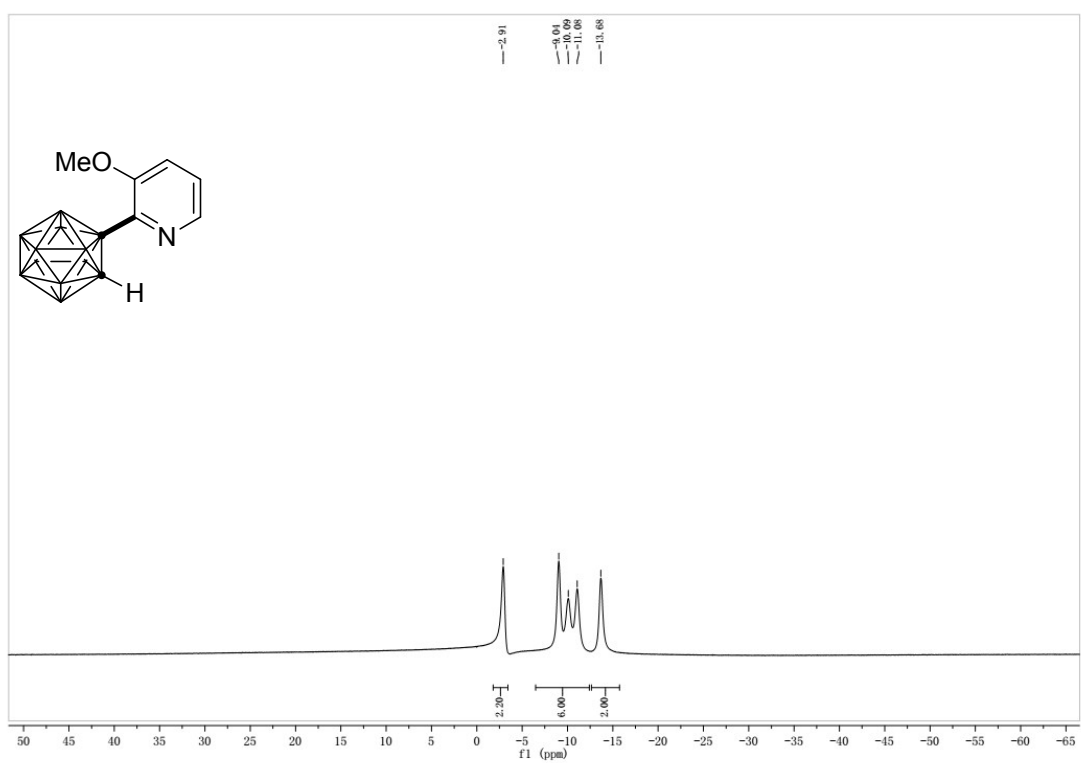

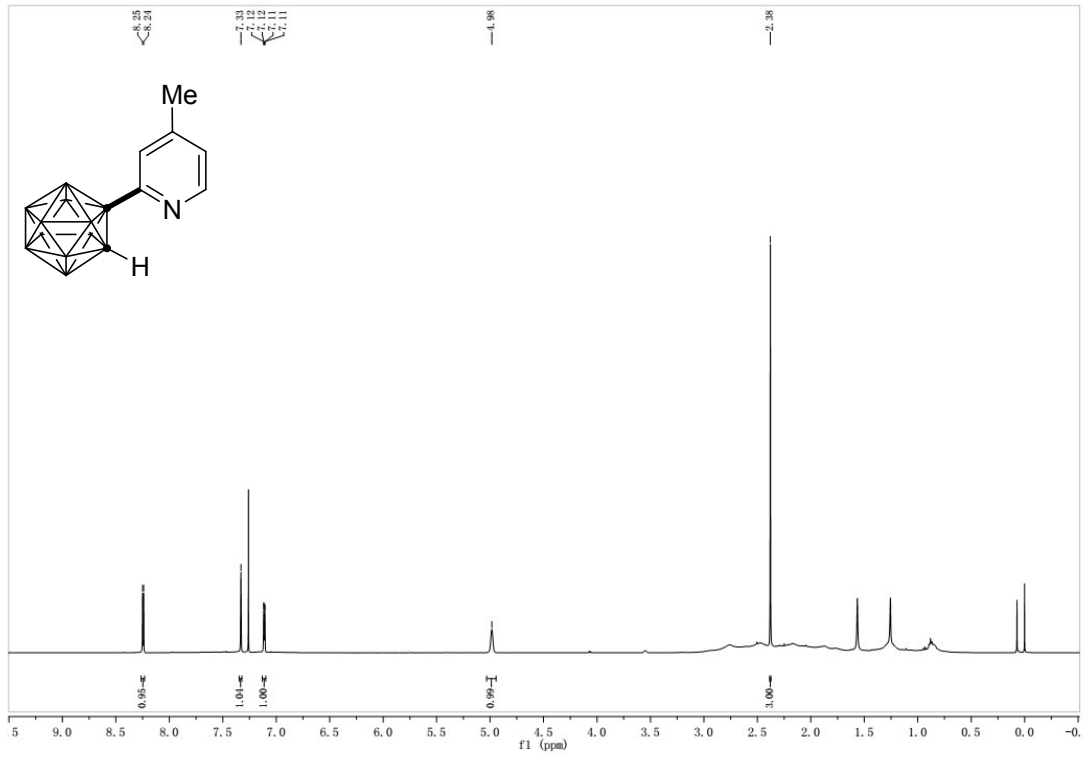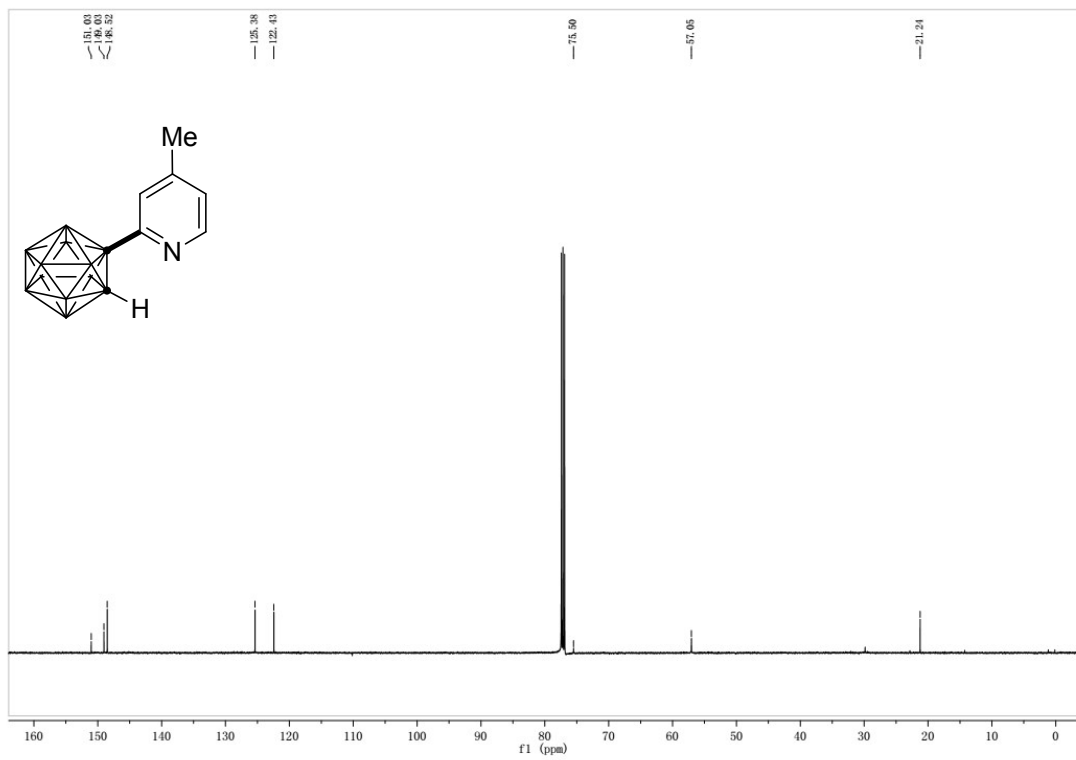





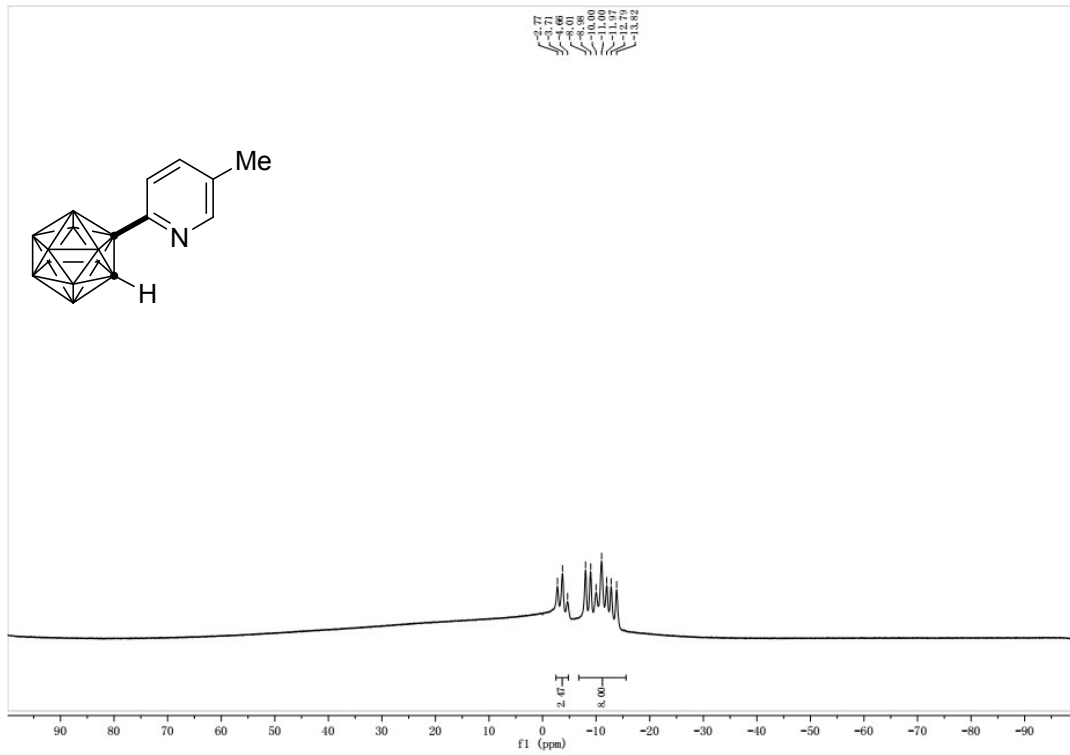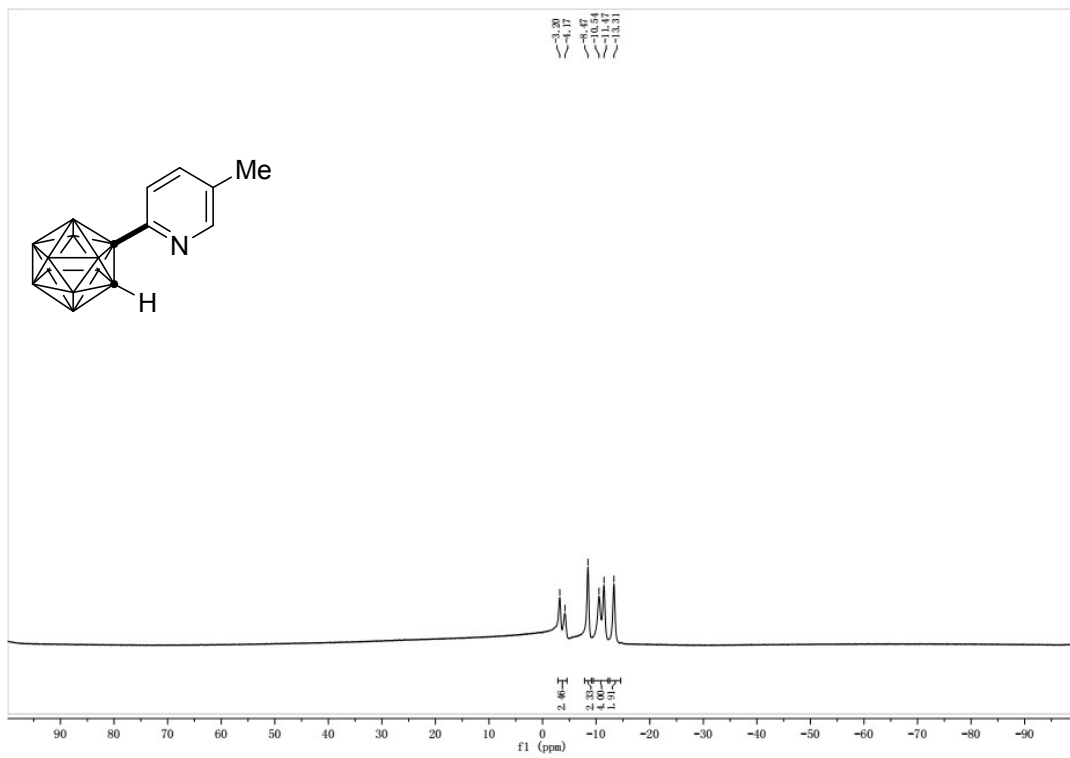

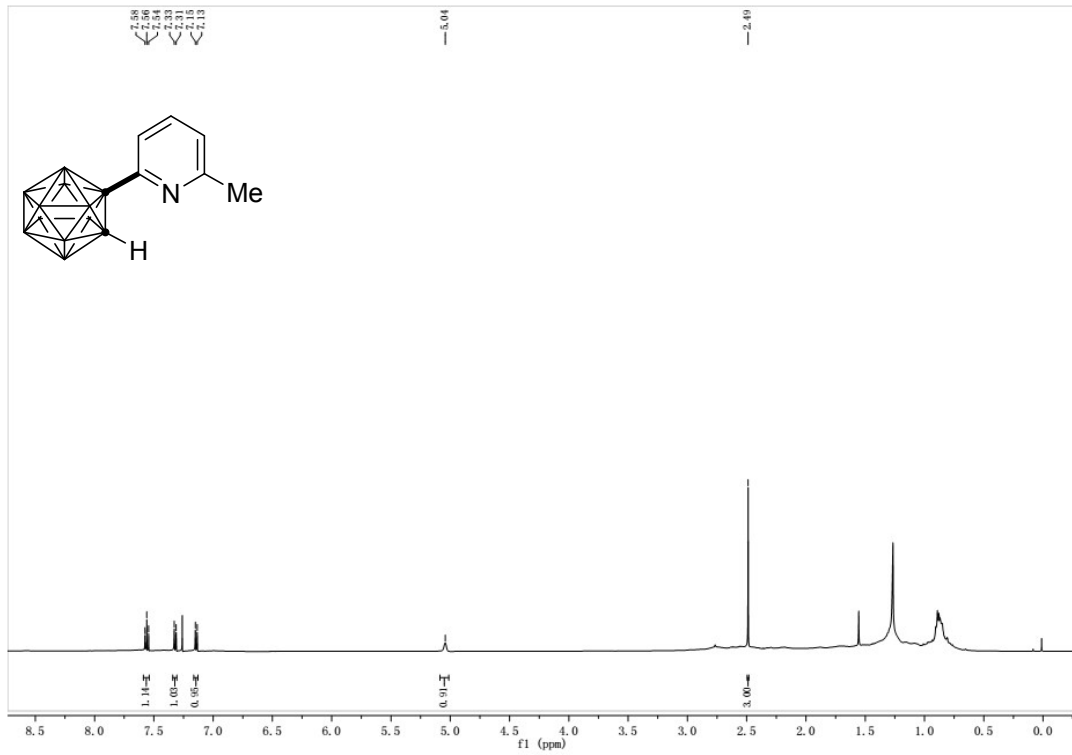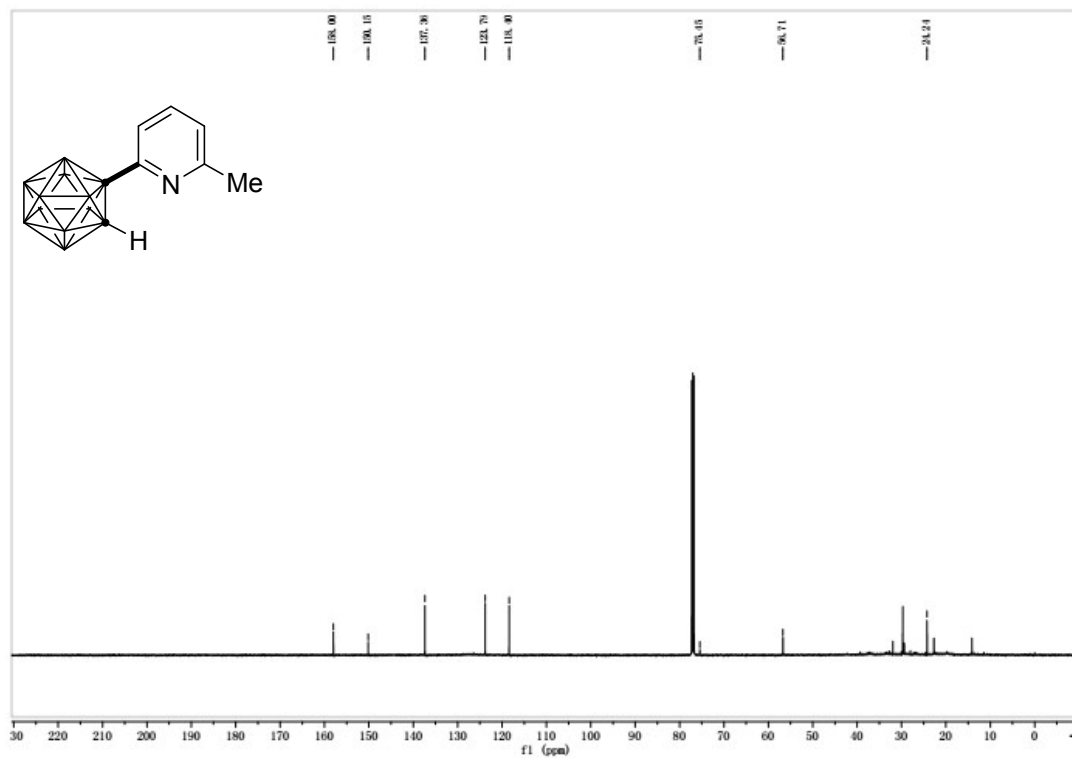



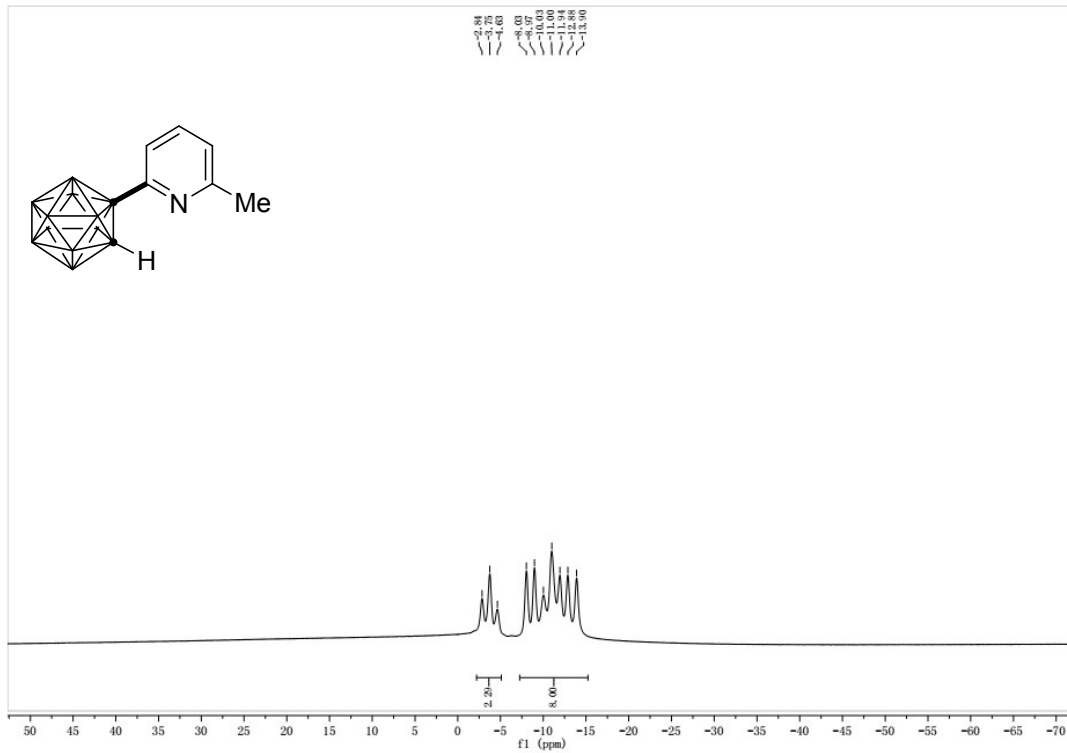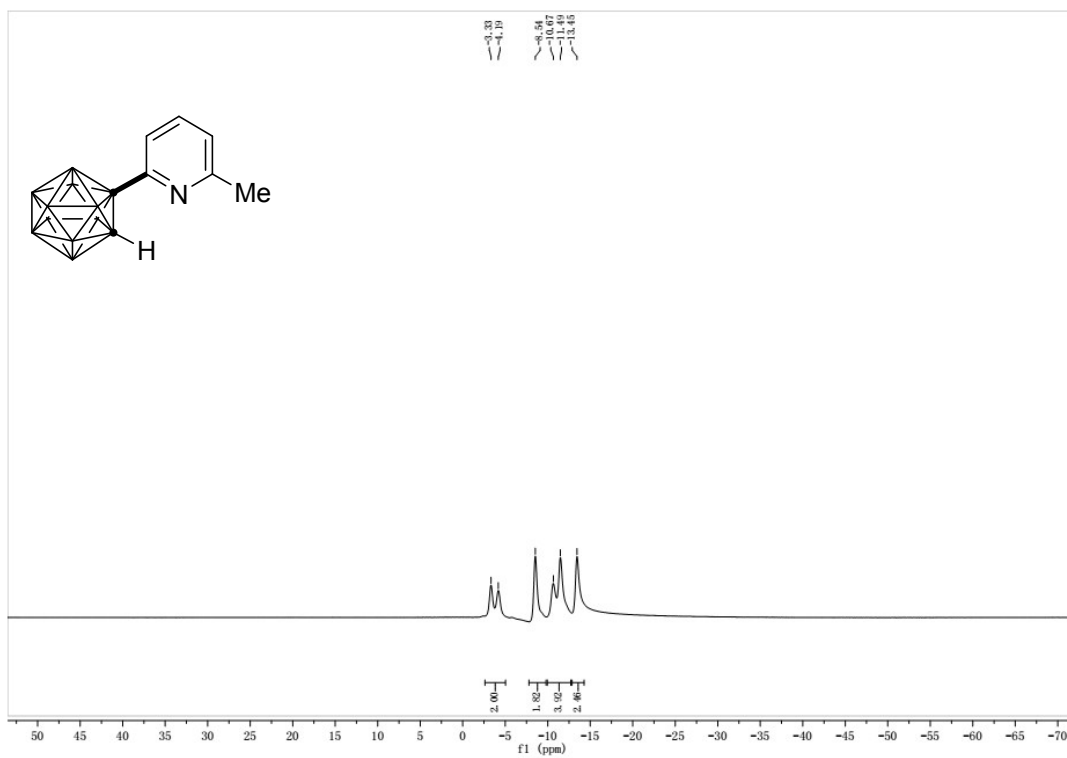

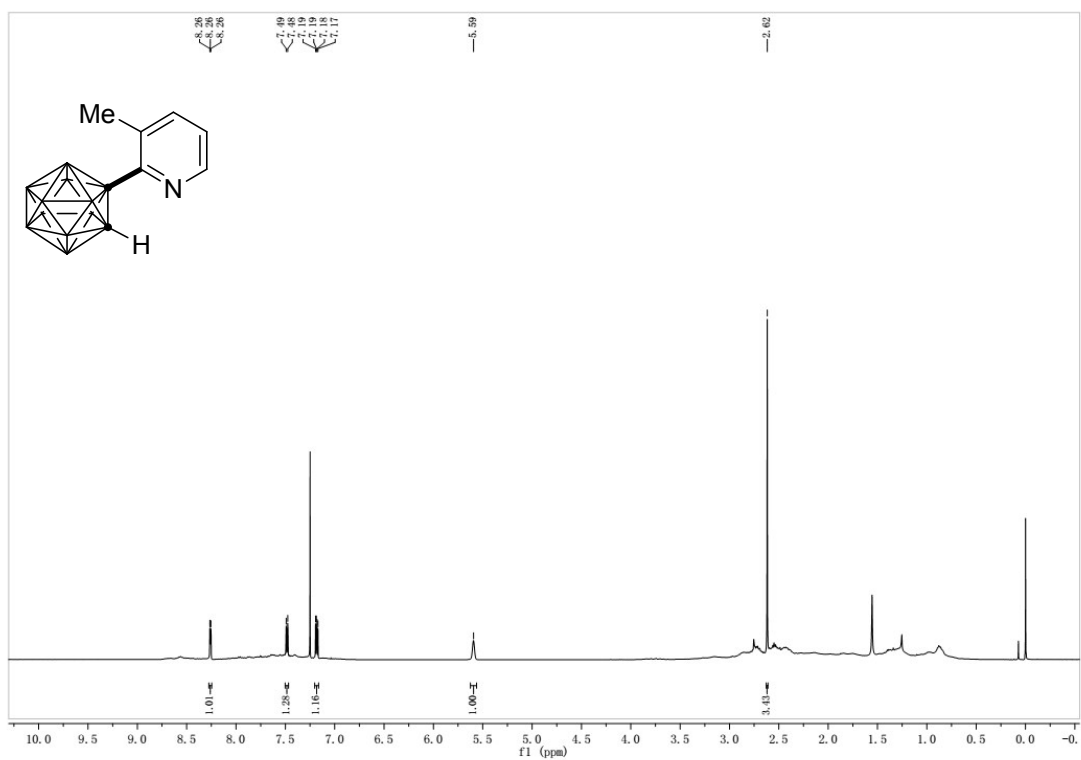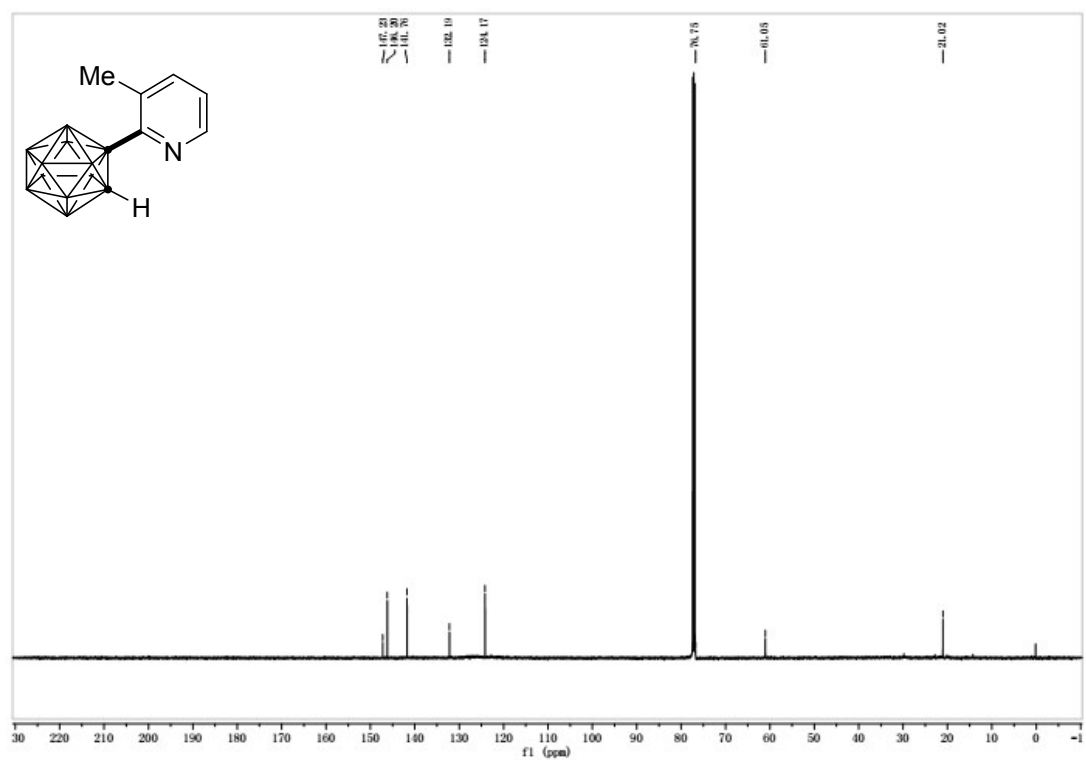

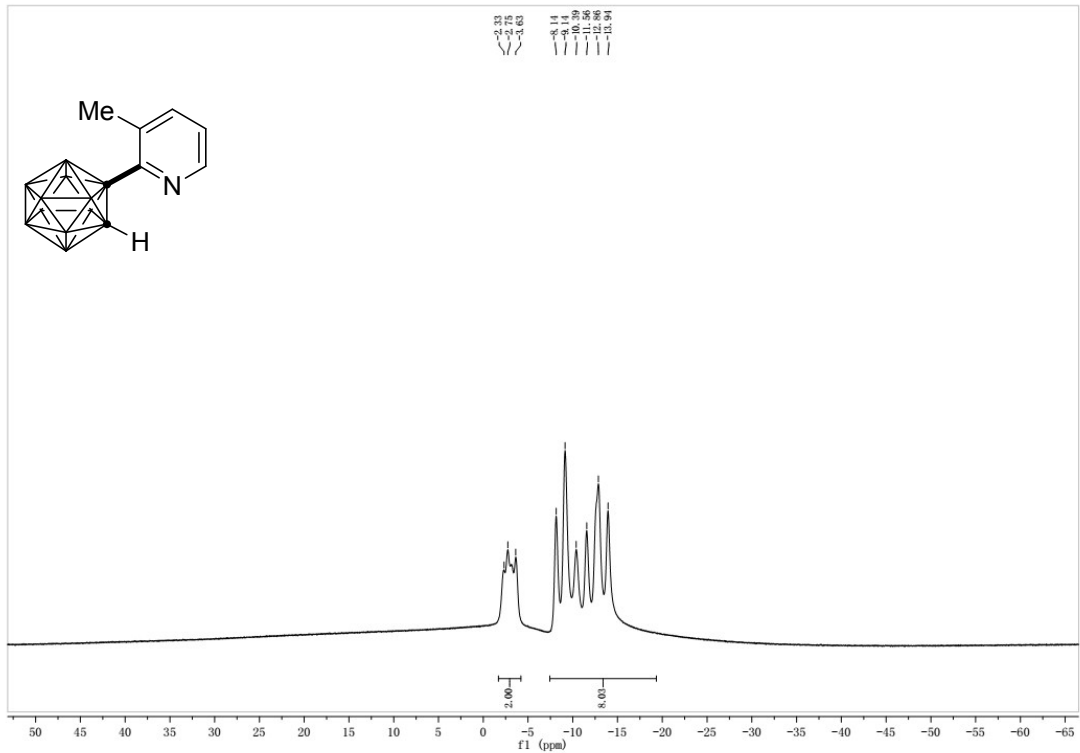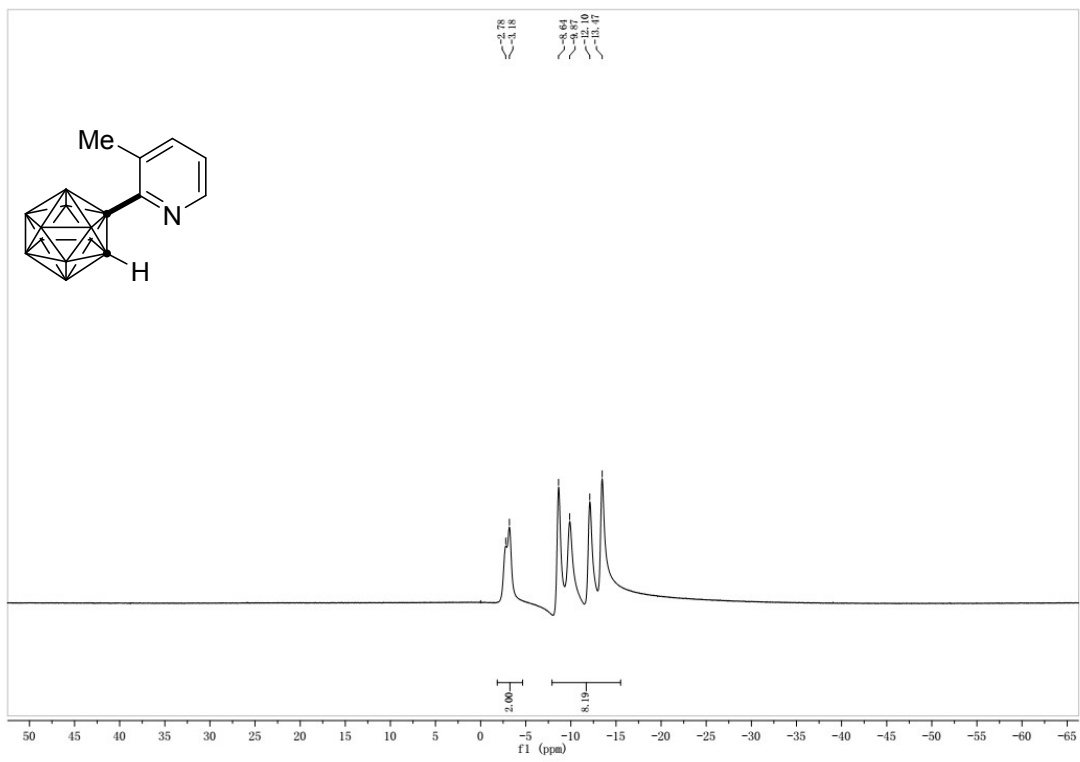

Supplement: c9ob00978g1.pdf [file c9ob00978g1.pdf]
